# Supplementary material for: An Expanded Genomic Representation of the Phylum Cyanobacteria
Source: PubMed Central journal article supplement (PMC4040986; doi:10.1093/gbe/evu073), 2014-05-02
Supplement: supp_evu073_Soo_GBE_Supplementary_Tables.pdf [file supp_evu073_Soo_GBE_Supplementary_Tables.pdf]

## **Supplementary Tables for**

### **An Expanded Genomic Representation of the Phylum Cyanobacteria**

Rochelle M. Soo, Connor T. Skennerton, Yuji Sekiguchi, Michael Imelfort, Samuel J. Paech, Paul G. Dennis, Jason A. Steen, Donovan H. Parks, Gene W. Tyson, and Philip Hugenholtz<sup>†</sup>

<sup>†</sup> Correspondence to: Philip Hugenholtz, [p.hugenholtz@uq.edu.au](mailto:p.hugenholtz@uq.edu.au)

**Table S1. Sequencing statistics**

EBPR1\_T1 to EBPR1\_T6 and EBPR2\_T1 to EBPR2\_T3 (blue) correspond to the nine samples collected from two enhanced biological phosphorous removal bioreactor (EBPR), Zag\_T1 to Zag\_T3 (red) correspond to the three time points where samples were collected from koala feces, MH\_F2, F3, F5, F6, F8, M3 and M8 correspond to human feces collected from seven Danish females and males (<http://www.metahit.eu/>) (purple) and A1, A2, F1 and F2 from the UASB (green). The combined assembly statistics is the amount of sequencing performed for all of the samples collected from EBPR, koala feces, Danish individuals or UASB. Genome population bins is the number of genome bins that was produced by GroopM v.1.0. The N50 is for all of the combined metagenomic data for each sample.

| Sample ID | Sampling Date | Combined shotgun sequencing assembly statistics for GroopM |                   |         | Mate pair sequencing   |                            |                   |
|-----------|---------------|------------------------------------------------------------|-------------------|---------|------------------------|----------------------------|-------------------|
|           |               | Shotgun sequence (Gbp)                                     | Number of contigs | N50     | Genome population bins | Mate pair sequencing (Gbp) | Insert size (kbp) |
| EBPR1_T1  | 05/27/11      | 26.2 (174,720,232 x 150bp)                                 | 148,338           | 1.4 kbp | 299                    | 4.88                       | 3.2-3.8           |
| EBPR1_T2  | 06/22/11      | 21.49 (143,317,626 x 150bp)                                |                   |         |                        |                            |                   |
| EBPR1_T3  | 08/01/11      | 23.76 (158,451,996 x 150bp)                                |                   |         |                        |                            |                   |
| EBPR1_T4  | 09/08/11      | 38.01 (253,461,380 x 150bp)                                |                   |         |                        |                            |                   |
| EBPR1_T5  | 11/25/11      | 16.78 (111,886,692 x 150bp)                                |                   |         |                        |                            |                   |
| EBPR1_T6  | 01/18/12      | 22.65 (151,023,810 x 150bp)                                |                   |         |                        | 5.72                       | 3.2-3.8           |
| EBPR2_T1  | 06/17/11      | 18.86 (125,756,890 x 150bp)                                |                   |         |                        | 6.15                       | 3.2-3.8           |
| EBPR2_T2  | 09/05/11      | 19.08 (127,217,526 x 150bp)                                |                   |         |                        |                            |                   |
| EBPR2_T3  | 12/16/11      | 24.81 (165,419,806 x 150bp)                                |                   |         |                        | 5.10                       | 3.2-3.8           |
| Zag_T1    | 05/12/11      | 10.68 (71,196,258 x 150bp)                                 | 17,101            | 4.6 kbp | 181                    | 1.99                       | 2-15              |
| Zag_T2    | 07/28/11      | 65.06 (433,763,472 x 150bp)                                |                   |         |                        | 1.89                       | 2-15              |
| Zag_T3    | 11/24/11      | 15.00 (100,022,578 x 150bp)                                |                   |         |                        | 1.87                       | 2-15              |
| UASB_A1   | 12/25/12      | 7.3 (32,365,294 x 250bp)                                   | 84,262            | 2.7 kbp | 154                    | 2.00                       | 5.5               |

|                   |          |                          |       |         |     |  |  |
|-------------------|----------|--------------------------|-------|---------|-----|--|--|
| UASB_A2           | 09/16/10 | 5.8 (23,420,132 x 250bp) |       |         |     |  |  |
| UASB_F1           | -        | 5.0 (23,027,350 x 250bp) |       |         |     |  |  |
| UASB_G1           | -        | 7.8 (35,467,130 x 250bp) |       |         |     |  |  |
| MH_F2<br>(M0002)  | -        | 3.49 (46,574,230 x 75bp) | 3,139 | 2.3 kbp | 119 |  |  |
| MH_F3<br>(MH0006) | -        | 6.96 (92,764,998 x 75bp) |       |         |     |  |  |
| MH_F5<br>(MH0021) | -        | 1.97 (26,262,536 x 75bp) |       |         |     |  |  |
| MH_F6<br>(MH0024) | -        | 1.61 (21,421,864 x 75bp) |       |         |     |  |  |
| MH_F8<br>(MH0028) | -        | 1.55 (20,637,196 x 75bp) |       |         |     |  |  |
| MH_M3<br>(MH0009) | -        | 4.38 (58,458,876 x 75bp) |       |         |     |  |  |
| MH_M8<br>(MH0031) | -        | 1.62 (21,566,850 x 75bp) |       |         |     |  |  |

**Table S2. List of 83 single copy gene markers**

The list of 83 single copy gene markers is a subset of the 111 single copy gene markers compiled by Dupont et al., 2012.

| <b>TIGR/PFAM</b> | <b>Name</b>                                            | <b>Size (aa)</b> |
|------------------|--------------------------------------------------------|------------------|
| TIGR00064        | ftsY: Signal recognition particle-docking protein FtsY | 279              |
| TIGR00082        | rbfA: ribosome-binding factor A                        | 115              |
| TIGR00086        | smpB: SsrA-binding protein                             | 144              |
| TIGR00092        | TIGR00092: GTP-binding protein YchF                    | 368              |
| TIGR00115        | tig: trigger factor                                    | 410              |
| TIGR00116        | tsf: translation elongation factor Ts                  | 293              |
| TIGR00158        | L9: ribosomal protein L9                               | 148              |
| TIGR00165        | S18: ribosomal protein S18                             | 70               |
| TIGR00337        | PyrG: CTP synthase                                     | 526              |
| TIGR00344        | alaS: alanine—tRNA ligase                              | 847              |
| TIGR02386        | rpoC_TIGR: DNA-directed RNA polymerase, beta subunit   | 1147             |
| TIGR02387        | rpoC1_cyan: DNA-directed RNA polymerase, gamma subunit | 619              |
| TIGR02397        | dnaX_nterm: DNA polymerase III, subunit gamma and tau  | 355              |
| TIGR02729        | Obg_CgtA: Obg family GTPase CgtA                       | 329              |
| TIGR02012        | tigrfam_recA: protein RecA                             | 321              |
| TIGR02013        | rpoB: DNA-directed RNA polymerase, beta subunit        | 1238             |
| TIGR02027        | rpoA: DNA-directed RNA polymerase, alpha subunit       | 298              |
| TIGR03263        | guanyl_kin: guanylate kinase                           | 180              |
| TIGR03594        | GTPase_EngA: ribosome-associated GTPase EngA           | 432              |
| TIGR00409        | proS_fam_II: proline—tRNA ligase                       | 568              |
| PF00162          | Phosphoglycerate kinase                                | 384              |
| PF00276          | Ribosomal protein L23                                  | 92               |
| PF00281          | Ribosomal protein L5                                   | 56               |
| PF00297          | Ribosomal protein L3                                   | 263              |
| PF00380          | Ribosomal protein S9/S16                               | 121              |
| PF00410          | Ribosomal protein S8                                   | 129              |
| PF00411          | Ribosomal protein S11                                  | 110              |
| PF00416          | Ribosomal protein S13/S18                              | 106              |
| PF00466          | Ribosomal protein L10                                  | 100              |
| PF00573          | Ribosomal protein L4/L1 family                         | 192              |
| PF01795          | MraW methylase family                                  | 310              |
| TIGR00001        | rpml_bact: ribosomal protein L35                       | 63               |
| TIGR00002        | S16: ribosomal protein S16                             | 78               |
| TIGR00019        | prfA: peptide chain release factor 1                   | 361              |
| TIGR00029        | S20: ribosomal protein S20                             | 87               |
| TIGR00043        | TIGR00043: metalloprotein, YbeY/UPF0054 family         | 111              |
| TIGR00059        | L17: ribosomal protein L17                             | 112              |
| TIGR00060        | L18_bact: ribosomal protein L18                        | 114              |
| TIGR00061        | L21: ribosomal protein L21                             | 101              |
| TIGR00166        | S6: ribosomal protein S6                               | 95               |
| TIGR00168        | infC: translation initiation factor IF-3               | 165              |
| TIGR00362        | DnaA: chromosomal replication initiator protein DnaA   | 437              |
| TIGR00388        | glyQ: glycine—tRNA ligase, alpha subunit               | 293              |

|           |                                                             |     |
|-----------|-------------------------------------------------------------|-----|
| TIGR00389 | glyS_dimeric: glycine—tRNA ligase                           | 565 |
| TIGR00459 | aspS_bact: aspartate—tRNA ligase                            | 586 |
| TIGR00460 | fmt: methionyl-tRNA formyltransferase                       | 315 |
| TIGR00468 | pheS: phenylalanine—tRNA ligase, alpha subunit              | 324 |
| TIGR00959 | ffh: signal recognition particle protein                    | 428 |
| TIGR00963 | secA: preprotein translocase, SecA subunit                  | 787 |
| TIGR00964 | secE_bact: preprotein translocase, SecE subunit             | 57  |
| TIGR00967 | 3a0501s007: preprotein translocase, SecY subunit            | 414 |
| TIGR00981 | rpsL_bact: ribosomal protein S12                            | 124 |
| TIGR01009 | rpsC_bact: ribosomal protein S3                             | 212 |
| TIGR01011 | rpsB_bact: ribosomal protein S2                             | 225 |
| TIGR01021 | rpsE_bact: ribosomal protein S5                             | 156 |
| TIGR01024 | rplS_bact: ribosomal protein L19                            | 114 |
| TIGR01029 | rpsG_bact: ribosomal protein S7                             | 154 |
| TIGR01032 | rplT_bact: ribosomal protein L20                            | 114 |
| TIGR01044 | rplV_bact: ribosomal protein L22                            | 103 |
| TIGR01049 | rpsJ_bact: ribosomal protein S10                            | 99  |
| TIGR01050 | rpsS_bact: ribosomal protein S19                            | 92  |
| TIGR01063 | gyrA: DNA gyrase, A subunit                                 | 800 |
| TIGR01066 | rplM_bact: ribosomal protein L13                            | 141 |
| TIGR01067 | rplN_bact: ribosomal protein L14                            | 122 |
| TIGR01071 | rplO_bact: ribosomal protein L15                            | 144 |
| TIGR01079 | rplX_bact: ribosomal protein L24                            | 104 |
| TIGR00471 | pheT_arch: phenylalanine—tRNA ligase, beta subunit          | 551 |
| TIGR00472 | pheT_bact: phenylalanine—tRNA ligase, beta subunit          | 798 |
| TIGR00487 | IF-2: translation initiation factor IF-2                    | 587 |
| TIGR00496 | frr: ribosome recycling factor                              | 176 |
| TIGR00575 | dnlj: DNA ligase, NAD-dependent                             | 652 |
| TIGR00631 | uvrb: excinuclease ABC subunit B                            | 658 |
| TIGR00663 | dnan: DNA polymerase III, beta subunit                      | 367 |
| TIGR00810 | secG: preprotein translocase, SecG subunit                  | 73  |
| TIGR00855 | L12: ribosomal protein L7/L12                               | 125 |
| TIGR00922 | nusG: transcription termination/antitermination factor NusG | 172 |
| TIGR01164 | rplP_bact: ribosomal protein L16                            | 126 |
| TIGR01169 | rplA_bact: ribosomal protein L1                             | 227 |
| TIGR01171 | rplB_bact: ribosomal protein L2                             | 275 |
| TIGR01391 | dnaG: DNA primase                                           | 414 |
| TIGR01393 | lepA: GTP-binding protein LepA                              | 595 |
| TIGR01632 | L11_bact: ribosomal protein L11                             | 140 |
| TIGR01953 | NusA: transcription termination factor NusA                 | 340 |

**Table S3. List of Oxyphotobacteria, Melainabacteria and Chloroflexi**  
Oxyphotobacteria representatives from IMG, as grouped by Shih et al., 2013 (group A to group G), Melainabacteria from Di Rienzi et al., 2013 and this study, as well as Chloroflexi from JGI IMG that were used to make the concatenated gene tree (Fig. 1A).

| <b>Phylum Cyanobacteria</b>                  |                      |
|----------------------------------------------|----------------------|
| <b>Class Oxyphotobacteria</b>                | <b>IMG Accession</b> |
| <b>Group A</b>                               |                      |
| <i>Arthrospira maxima</i> CS-328             | 642979357            |
| <i>Arthrospira platensis</i> C1              | 2507262036           |
| <i>Arthrospira</i> sp. PCC 8005              | 648276619            |
| <i>Arthrospira platensis</i> NIES-39         | 650377906            |
| <i>Lyngbya</i> sp. CCY 8106                  | 639857035            |
| <i>Trichodesmium erythraeum</i> IMS101       | 637000329            |
| <i>Oscillatoria</i> sp. PCC 6506             | 648276706            |
| <i>Oscillatoria nigro-viridis</i> PCC 7112   | 2503982035           |
| <i>Oscillatoria acuminata</i> PCC 6304       | 2509276028           |
| <b>Group B</b>                               |                      |
| <i>Cyanothece</i> sp. BH68, ATCC 51142       | 641522622            |
| <i>Crocospaera watsonii</i> WH 8501          | 2531839001           |
| <i>Cyanobacterium</i> UCYN-A                 | 646311970            |
| <i>Cyanothece</i> sp. PCC 8801               | 643348535            |
| <i>Synechocystis</i> sp. PCC 6803            | 637000315            |
| <i>Cyanothece</i> sp. PCC 7424               | 643348533            |
| <i>Cyanothece</i> sp. PCC 7822               | 648028021            |
| <i>Microcystis aeruginosa</i> NIES-843       | 641522640            |
| <i>Pleurocapsa</i> sp. PCC 7327              | 2509276061           |
| <i>Synechococcus</i> sp. PCC 7002            | 641522654            |
| <i>Leptolyngbya</i> sp. PCC 7376             | 2503754048           |
| <i>Cyanobacterium stanieri</i> PCC 7202      | 2503283023           |
| <i>Cyanobacterium aponinum</i> PCC 10605     | 2503707009           |
| <i>Stanieria cyanosphaera</i> PCC 7437       | 2503754019           |
| <i>Chroococciopsis</i> sp. PCC 6712          | 2505679029           |
| <i>Spirulina major</i> PCC 6313              | 2506520014           |
| <i>Spirulina subsalsa</i> PCC 9445           | 2506520011           |
| <i>Dactylococcopsis salina</i> PCC 8305      | 2509276056           |
| <i>Halothece</i> sp. PCC 7418                | 2503538028           |
| <i>Microcoleus chthonoplastes</i> PCC 7420   | 647533184            |
| <i>Microcoleus</i> sp. PCC 7113              | 2509276031           |
| <i>Cylindrospermopsis raciborskii</i> CS-505 | 647000233            |
| <i>Raphidiopsis brookii</i> D9               | 647000303            |
| <i>Nostoc azollae</i> 0708                   | 648028001            |
| <i>Anabaena cylindrica</i> PCC 7122          | 2503982047           |
| <i>Anabaena</i> sp. PCC 7108                 | 2506485002           |
| <i>Nostoc punctiforme</i> PCC 73102          | 642555144            |
| <i>Calothrix</i> sp. PCC 7507                | 2505679032           |

|                                                   |            |
|---------------------------------------------------|------------|
| <i>Nodularia spumigena</i> CCY9414                | 639857037  |
| <i>Nostoc</i> sp. PCC 7120                        | 637000199  |
| <i>Anabaena variabilis</i> ATCC 29413             | 646564504  |
| <i>Nostoc</i> sp. PCC 7524                        | 2509601032 |
| <i>Nostoc</i> sp. PCC 7107                        | 2503707008 |
| <i>Rivularia</i> sp. PCC 7116                     | 2510065008 |
| <i>Calothrix</i> sp. PCC 6303                     | 2503982036 |
| <i>Fischerella</i> sp. JSC-11                     | 2505679024 |
| <i>Gloeocapsa</i> sp. PCC 7428                    | 2503754017 |
| <i>Chroococidiopsis thermalis</i> PCC 7203        | 2503538021 |
| <i>Crinalium epipsammum</i> PCC 9333              | 2504643013 |
| <b>Group C</b>                                    |            |
| <i>Synechococcus</i> sp. CC9616                   | 2517093019 |
| <i>Prochlorococcus</i> sp. WH8102                 | 637000314  |
| <i>Prochlorococcus</i> sp. CC9605                 | 637000310  |
| <i>Prochlorococcus</i> sp. CC9902                 | 637000311  |
| <i>Prochlorococcus</i> sp. CC9311                 | 637000309  |
| <i>Synechococcus</i> sp. WH 8016                  | 2507262052 |
| <i>Prochlorococcus</i> sp. WH 7803                | 640427149  |
| <i>Prochlorococcus marinus pastoris</i> CCMP 1986 | 637000214  |
| <i>Prochlorococcus marinus</i> MIT 9515           | 640069324  |
| <i>Prochlorococcus marinus</i> AS9601             | 640069321  |
| <i>Prochlorococcus marinus</i> NATL2A             | 637000212  |
| <i>Prochlorococcus marinus marinus</i> CCMP 1375  | 637000213  |
| <i>Prochlorococcus marinus</i> MIT 9211           | 641228501  |
| <i>Prochlorococcus marinus</i> MIT 9313           | 637000211  |
| <i>Cyanobium</i> sp. PCC 7001                     | 647533126  |
| <i>Cyanobium gracile</i> PCC 6307                 | 2508501011 |
| <i>Synechococcus</i> sp. RCC307                   | 640427148  |
| <i>Synechococcus elongatus</i> PCC 6301           | 637000307  |
| <i>Synechococcus elongatus</i> PCC 7942           | 637000308  |
| <b>Group D</b>                                    |            |
| <i>Cyanobacterium</i> sp. JSC-1                   | 2502171143 |
| <i>Oscillatoriales</i> sp. JSC-12                 | 2510065010 |
| <b>Group E</b>                                    |            |
| <i>Thermosynechococcus elongatus</i> BP-1         | 637000320  |
| <i>Synechococcus</i> sp. PCC 6312                 | 2509276030 |
| <i>Cyanothece</i> sp. PCC 7425                    | 643348534  |
| <i>Acaryochloris marina</i> MBIC11017             | 641228474  |
| <b>Group F</b>                                    |            |
| <i>Pseudanabaena</i> sp. PCC 7367                 | 2504643012 |
| <i>Synechococcus</i> sp. PCC 7502                 | 2508501041 |
| <b>Group G</b>                                    |            |
| <i>Synechococcus</i> sp. JA-3-3Ab                 | 637000313  |
| <i>Synechococcus</i> sp. PE A4 65AY6A             | 2512875021 |
| <i>Synechococcus</i> sp. JA-2-3B                  | 637000312  |
| <i>Synechococcus</i> sp. PCC 7336                 | 2506520048 |

|                                                     |            |
|-----------------------------------------------------|------------|
| <i>Gloeobacter violaceus</i> PCC 7421               | 637000121  |
| <i>Geitlerinema</i> sp. PCC 7407                    | 2503538020 |
|                                                     |            |
| <b>Class Melainabacteria</b>                        |            |
| <i>Ca. Obscuribacter phosphatis</i>                 | 2541046960 |
| <i>Ca. Caenarcanophila bioreactus</i>               | 2531839742 |
| <i>Ca. Gastroanaerophila phascolarctos</i>          | 2523533519 |
| Za_1                                                | 2523533517 |
| Zag_111                                             | 2531839741 |
| MH_37                                               | 2522572068 |
| ACD20                                               | 2541046958 |
| MEL_A1                                              | 2541016959 |
| MEL_B1                                              | 2541046956 |
| MEL_B2                                              | 2541046940 |
| MEL_C1                                              | 2541046938 |
|                                                     |            |
| <b>Phylum Chloroflexi</b>                           |            |
| <b>Class Chloroflexi</b>                            |            |
| <i>Chloroflexus aurantiacus</i> J-10-fl             | 641228485  |
| <i>Chloroflexus aggregans</i> DSM 9485              | 643348527  |
| <i>Oscillochloris trichoides</i> DG6                | 649989977  |
| <i>Roseiflexus</i> sp. RS-1                         | 640427139  |
| <i>Roseiflexus castenholzii</i> HLO8, DSM 13941     | 640753047  |
| <i>Herpetosiphon aurantiacus</i> DSM 785            | 2508501111 |
| <b>Class Thermomicrobia</b>                         |            |
| <i>Thermomicrobium roseum</i> DSM 5159              | 643348582  |
| <i>Sphaerobacter thermophilus</i> 4ac11, DSM 20745  | 646311953  |
| <i>Thermobaculum terrenum</i> YNP1 ATCC BAA-798     | 646311962  |
| <b>Class Anaerolineae</b>                           |            |
| <i>Anaerolinea thermophila</i> UNI-1                | 649633005  |
| <b>Class Dehalococcoidia</b>                        |            |
| <i>Dehalococcoides</i> sp. BAV1                     | 640427111  |
| <i>Dehalogenimonas lykanthroporepellens</i> BL-DC-9 | 648028022  |



**Table S4. List of Oxyphotobacteria, Melainabacteria and outgroups using universal single copy bacterial marker gene sets**

Bacterial and archaeal genomes used to produce **Figs S3 and S4**. Organisms in black were used to produce phylogenetic trees using both the 38 marker and 83 marker sets. Organisms in blue were used for phylogenetic trees made with the 83 marker set only and organisms in red were used for phylogenetic trees made with the 38 marker set.

| <b>Phylum</b>  | <b>Organism name</b>                                        | <b>IMG/NCBI accession</b> |
|----------------|-------------------------------------------------------------|---------------------------|
| Acidobacteria  | <i>Acidobacterium capsulatum</i> ATCC 51196                 | 643692001                 |
| Acidobacteria  | <i>Granulicella mallensis</i> MP5ACTX8                      | 648276601                 |
| Acidobacteria  | <i>Korebacter versatilis</i> Ellin345                       | 637000001                 |
| Acidobacteria  | <i>Solibacter usitatus</i> Ellin6076                        | 639633060                 |
| Acidobacteria  | <i>Terriglobus saanensis</i> SP1PR4                         | 649633100                 |
| Actinobacteria | <i>Acidimicrobium ferrooxidans</i> ICP, DSM 10331           | 644736322                 |
| Actinobacteria | <i>Atopobium parvulum</i> IPP 1246, DSM 20469               | 644736327                 |
| Actinobacteria | <i>Bifidobacterium longum</i> DJO10A                        | 642555107                 |
| Actinobacteria | <i>Conexibacter woesei</i> ID131577, DSM 14684              | 646311917                 |
| Actinobacteria | <i>Corynebacterium efficiens</i> YS-314                     | 644736345                 |
| Actinobacteria | <i>Cryptobacterium curtum</i> 12-3, DSM 15641               | 644736346                 |
| Actinobacteria | <i>Eggerthella lenta</i> VPI 0255, DSM 2243                 | 644736358                 |
| Actinobacteria | <i>Gordonibacter pamelaee</i> 7-10-1-bT, DSM 19378          | 650377943                 |
| Actinobacteria | <i>Leifsonia xyli xyli</i> CTCB07                           | 637000149                 |
| Actinobacteria | <i>Micrococcus luteus</i> Fleming NCTC 2665                 | 644736390                 |
| Actinobacteria | <i>Microlunatus phosphovorius</i> NM-1                      | 650716058                 |
| Actinobacteria | <i>Micromonospora</i> sp. L5                                | 649633069                 |
| Actinobacteria | <i>Propionibacterium freudenreichii shermanii</i> CIRM-BIA1 | 649633084                 |
| Actinobacteria | <i>Rhodococcus jostii</i> RHA1                              | 637000234                 |
| Actinobacteria | <i>Rubrobacter xylanophilus</i> DSM 9941                    | 637000248                 |
| Actinobacteria | <i>Streptomyces scabiei</i> 87.22                           | 646564576                 |
| Actinobacteria | <i>Thermobifida fusca</i> YX                                | 637000319                 |
| Aquificae      | <i>Aquifex aeolicus</i> VF5                                 | 637000010                 |
| Aquificae      | <i>Desulfurobacterium thermolithotrophum</i> BSA, DSM 11699 | 649633039                 |
| Aquificae      | <i>Hydrogenivirga</i> sp. 128-5-R1-1                        | 641380441                 |
| Aquificae      | <i>Hydrogenobacter thermophilus</i> TK-6, DSM 6534          | 646311936                 |
| Aquificae      | <i>Hydrogenobaculum</i> sp. SN                              | 647000261                 |
| Aquificae      | <i>Persephonella marina</i> EX-H1                           | 643692030                 |
| Aquificae      | <i>Sulfurihydrogenibium azorense</i> Az-Fu1                 | 643692050                 |
| Aquificae      | <i>Sulfurihydrogenibium</i> sp. YO3AOP1                     | 642555165                 |
| Aquificae      | <i>Thermocrinis albus</i> HI 11/12, DSM 14484               | 646564582                 |
| Aquificae      | <i>Thermovibrio ammonificans</i> HB-1, DSM                  | 649633104                 |

|               |                                                    |           |
|---------------|----------------------------------------------------|-----------|
|               | 15698                                              |           |
| Bacteroidetes | <i>Bacteroides fragilis</i> 3_1_12                 | 645058788 |
| Bacteroidetes | <i>Bacteroidetes</i> sp. F0058                     | 648861005 |
| Bacteroidetes | <i>Capnocytophaga gingivalis</i> ATCC 33624        | 643886113 |
| Bacteroidetes | <i>Chitinophaga pinensis</i> UQM 2034, DSM 2588    | 644736340 |
| Bacteroidetes | <i>Chryseobacterium gleum</i> F93, ATCC 35910      | 643886082 |
| Bacteroidetes | <i>Croceibacter atlanticus</i> HTCC2559            | 648028020 |
| Bacteroidetes | <i>Cytophaga hutchinsonii</i> ATCC 33406           | 637000087 |
| Bacteroidetes | <i>Flavobacterium johnsoniae</i> UW101, ATCC 17061 | 644736369 |
| Bacteroidetes | <i>Kordia algicida</i> OT-1                        | 641380434 |
| Bacteroidetes | <i>Leadbetterella byssophila</i> 4M15, DSM 17132   | 649633063 |
| Bacteroidetes | <i>Parabacteroides merdae</i> ATCC 43184           | 640963016 |
| Bacteroidetes | <i>Porphyromonas asaccharolytica</i> PR426713P-I   | 649989985 |
| Bacteroidetes | <i>Porphyromonas endodontalis</i> ATCC 35406       | 643886148 |
| Bacteroidetes | <i>Porphyromonas gingivalis</i> ATCC 33277         | 642555148 |
| Bacteroidetes | <i>Prevotella melaninogenica</i> ATCC 25845        | 648028051 |
| Bacteroidetes | <i>Prevotella tannerae</i> ATCC 51259              | 645951840 |
| Bacteroidetes | <i>Psychroflexus torquis</i> ATCC 700755           | 638341165 |
| Bacteroidetes | <i>Sphingobacterium spiritivorum</i> ATCC 33300    | 643886135 |
| Chlamydiae    | <i>Chlamydia muridarum</i> MoPn / Nigg             | 637000062 |
| Chlamydiae    | <i>Chlamydia trachomatis</i> A/HAR-13              | 637000063 |
| Chlamydiae    | <i>Chlamydophila abortus</i> S26/3                 | 637000065 |
| Chlamydiae    | <i>Chlamydophila caviae</i> GPIC                   | 637000066 |
| Chlamydiae    | <i>Chlamydophila felis</i> Fe/C-56                 | 637000067 |
| Chlamydiae    | <i>Chlamydophila pecorum</i> E58                   | 650716022 |
| Chlamydiae    | <i>Chlamydophila pneumoniae</i> AR39               | 637000068 |
| Chlamydiae    | <i>Chlamydophila psittaci</i> 01DC11               | 651053012 |
| Chlamydiae    | <i>Parachlamydia acanthamoebae</i> Hall's coccus   | 647000287 |
| Chlamydiae    | <i>Simkania negevensis</i> Z                       | 650716085 |
| Chlamydiae    | <i>Waddlia chondrophila</i> WSU 86-1044            | 646564588 |
| Chlorobi      | <i>Chlorobaculum parvum</i> NCIB 8327              | 642555120 |
| Chlorobi      | <i>Chlorobium chlorochromatii</i> CaD3             | 637000072 |
| Chlorobi      | <i>Chlorobium limicola</i> DSM 245                 | 642555121 |
| Chlorobi      | <i>Chlorobium phaeobacteroides</i> BS1             | 642555122 |
| Chlorobi      | <i>Chlorobium phaeovibrioides</i> DSM 265          | 640427130 |
| Chlorobi      | <i>Chlorobium tepidum</i> TLS                      | 637000073 |
| Chlorobi      | <i>Chloroherpeton thalassium</i> ATCC 35110        | 642555123 |
| Chlorobi      | <i>Pelodictyon luteolum</i> DSM 273                | 637000205 |
| Chlorobi      | <i>Pelodictyon phaeoclathratiforme</i> BU-1        | 642555146 |
| Chlorobi      | <i>Prosthecochloris aestuarii</i> SK413, DSM 271   | 642555149 |
| Chloroflexi   | <i>Anaerolinea thermophila</i> UNI-1               | 649633005 |
| Chloroflexi   | <i>Chloroflexus aggregans</i> DSM 9485             | 643348527 |
| Chloroflexi   | <i>Chloroflexus aurantiacus</i> J-10-fl            | 641228485 |
| Chloroflexi   | <i>Dehalococcoides ethenogenes</i> 195             | 637000089 |
| Chloroflexi   | <i>Dehalococcoides</i> sp. BAV1                    | 640427111 |

|                |                                                     |            |
|----------------|-----------------------------------------------------|------------|
| Chloroflexi    | <i>Dehalogenimonas lykanthroporepellens</i> BL-DC-9 | 648028022  |
| Chloroflexi    | <i>Herpetosiphon aurantiacus</i> DSM 785            | 641228494  |
| Chloroflexi    | <i>Oscillochloris trichoides</i> DG6                | 649989977  |
| Chloroflexi    | <i>Roseiflexus castenholzii</i> HLO8, DSM 13941     | 640753047  |
| Chloroflexi    | <i>Roseiflexus</i> sp. RS-1                         | 640427139  |
| Chloroflexi    | <i>Sphaerobacter thermophilus</i> 4ac11, DSM 20745  | 646311953  |
| Chloroflexi    | <i>Thermobaculum terrenum</i> YNP1, ATCC BAA-798    | 646311962  |
| Chloroflexi    | <i>Thermomicrobium roseum</i> DSM 5159              | 643348582  |
| Chrysiogenetes | <i>Desulfurispirillum indicum</i> S5, DSM 22839     | 649633038  |
| Cyanobacteria  | <i>Acaryochloris marina</i> MBIC11017               | 641228474  |
| Cyanobacteria  | ACD20                                               | 2541046958 |
| Cyanobacteria  | <i>Anabaena variabilis</i> ATCC 29413               | 646564504  |
| Cyanobacteria  | <i>Arthrospira maxima</i> CS-328                    | 642979357  |
| Cyanobacteria  | <i>Arthrospira platensis</i> NIES-39                | 650377906  |
| Cyanobacteria  | <i>Arthrospira</i> sp. PCC 8005                     | 648276619  |
| Cyanobacteria  | <i>Candidatus Caenarcanophila bioreactus</i>        | 2523533519 |
| Cyanobacteria  | <i>Candidatus Gastroanaerophila phascolarctos</i>   | 2523533519 |
| Cyanobacteria  | <i>Candidatus Obscuribacter phosphatis</i>          | 2541046960 |
| Cyanobacteria  | <i>Crocospaera watsonii</i> WH 8501                 | 638341074  |
| Cyanobacteria  | cyanobacterium UCYN-A                               | 646311970  |
| Cyanobacteria  | <i>Cyanobium</i> sp. PCC 7001                       | 647533126  |
| Cyanobacteria  | <i>Cyanothece</i> sp. BH68, ATCC 51142              | 641522622  |
| Cyanobacteria  | <i>Cyanothece</i> sp. PCC 7424                      | 643348533  |
| Cyanobacteria  | <i>Cyanothece</i> sp. PCC 7425                      | 643348534  |
| Cyanobacteria  | <i>Cyanothece</i> sp. PCC 7822                      | 648028021  |
| Cyanobacteria  | <i>Cyanothece</i> sp. PCC 8801                      | 643348535  |
| Cyanobacteria  | <i>Cylindrospermopsis raciborskii</i> CS-505        | 647000233  |
| Cyanobacteria  | <i>Gloeobacter violaceus</i> PCC 7421               | 637000121  |
| Cyanobacteria  | <i>Lyngbya</i> sp. CCY 8106                         | 639857035  |
| Cyanobacteria  | MEL_A1                                              | 2541046959 |
| Cyanobacteria  | MEL_B1                                              | 2541046956 |
| Cyanobacteria  | MEL_B2                                              | 2541046940 |
| Cyanobacteria  | MEL_C1                                              | 2541046938 |
| Cyanobacteria  | MH_37                                               | 2522572068 |
| Cyanobacteria  | <i>Microcoleus chthonoplastes</i> PCC 7420          | 647533184  |
| Cyanobacteria  | <i>Microcystis aeruginosa</i> NIES-843              | 641522640  |
| Cyanobacteria  | <i>Nodularia spumigena</i> CCY9414                  | 639857037  |
| Cyanobacteria  | <i>Nostoc azollae</i> 0708                          | 648028001  |
| Cyanobacteria  | <i>Nostoc punctiforme</i> PCC 73102                 | 642555144  |
| Cyanobacteria  | <i>Nostoc</i> sp. PCC 7120                          | 637000199  |
| Cyanobacteria  | <i>Oscillatoria</i> sp. PCC 6506                    | 648276706  |
| Cyanobacteria  | <i>Prochlorococcus marinus</i> AS9601               | 640069321  |
| Cyanobacteria  | <i>Prochlorococcus marinus marinus</i> CCMP1375     | 637000213  |
| Cyanobacteria  | <i>Prochlorococcus marinus</i> MIT 9211             | 641228501  |

|                 |                                                            |            |
|-----------------|------------------------------------------------------------|------------|
| Cyanobacteria   | <i>Prochlorococcus marinus</i> MIT 9313                    | 637000211  |
| Cyanobacteria   | <i>Prochlorococcus marinus</i> MIT 9515                    | 640069324  |
| Cyanobacteria   | <i>Prochlorococcus marinus</i> NATL2A                      | 637000212  |
| Cyanobacteria   | <i>Prochlorococcus marinus pastoris</i><br>CCMP1986        | 637000214  |
| Cyanobacteria   | <i>Prochlorococcus</i> sp. CC9311                          | 637000309  |
| Cyanobacteria   | <i>Prochlorococcus</i> sp. CC9605                          | 637000310  |
| Cyanobacteria   | <i>Prochlorococcus</i> sp. CC9902                          | 637000311  |
| Cyanobacteria   | <i>Prochlorococcus</i> sp. WH 7803                         | 640427149  |
| Cyanobacteria   | <i>Prochlorococcus</i> sp. WH8102                          | 637000314  |
| Cyanobacteria   | <i>Raphidiopsis brookii</i> D9                             | 647000303  |
| Cyanobacteria   | <i>Synechococcus elongatus</i> PCC 6301                    | 637000307  |
| Cyanobacteria   | <i>Synechococcus</i> sp. CC9616                            | 2514885022 |
| Cyanobacteria   | <i>Synechococcus</i> sp. CC9616                            | 2517093019 |
| Cyanobacteria   | <i>Synechococcus</i> sp. JA-2-3B                           | 637000312  |
| Cyanobacteria   | <i>Synechococcus</i> sp. JA-3-3Ab                          | 637000313  |
| Cyanobacteria   | <i>Synechococcus</i> sp. PCC 7002                          | 641522654  |
| Cyanobacteria   | <i>Synechococcus</i> sp. RCC307                            | 640427148  |
| Cyanobacteria   | <i>Synechocystis</i> sp. PCC 6803                          | 637000315  |
| Cyanobacteria   | <i>Thermosynechococcus elongatus</i> BP-1                  | 637000320  |
| Cyanobacteria   | <i>Trichodesmium erythraeum</i> IMS101                     | 637000329  |
| Cyanobacteria   | Zag_1                                                      | 2523533517 |
| Cyanobacteria   | Zag_111                                                    | 2531839741 |
| Deferribacteres | <i>Calditerrivibrio nitroreducens</i> Yu37-1, DSM<br>19672 | 649633026  |
| Deferribacteres | <i>Deferribacter desulfuricans</i> SSM1, DSM<br>14783      | 646564525  |
| Deferribacteres | <i>Denitrovibrio acetiphilus</i> N2460, DSM 12809          | 646564527  |
| Dictyoglomi     | <i>Dictyoglomus thermophilum</i> H-6-12, ATCC<br>35947     | 643348542  |
| Dictyoglomi     | <i>Dictyoglomus turgidum</i> DSM 6724                      | 643348543  |
| Elusimicrobia   | <i>Candidatus Endomicrobium</i> sp. Rs-D17                 | 642555172  |
| Elusimicrobia   | <i>Elusimicrobium minutum</i> Pei191                       | 642555127  |
| Firmicutes      | <i>Acetohalobium arabaticum</i> Z-7288, DSM<br>5501        | 648028002  |
| Firmicutes      | <i>Clostridium thermocellum</i> ATCC 27405                 | 640069309  |
| Firmicutes      | <i>Coprothermobacter proteolyticus</i> DSM 5265            | 643348530  |
| Firmicutes      | <i>Halothermothrix orenii</i> H 168                        | 643348557  |
| Firmicutes      | <i>Mesoplasma florum</i> L1                                | 637000158  |
| Firmicutes      | <i>Moorella thermoacetica</i> ATCC 39073                   | 637000167  |
| Firmicutes      | <i>Mycoplasma mobile</i> 163K                              | 637000180  |
| Firmicutes      | <i>Pelotomaculum thermopropionicum</i> SI                  | 640427128  |
| Firmicutes      | <i>Syntrophothermus lipocalidus</i> DSM 12680              | 646564577  |
| Fusobacteria    | <i>Fusobacterium gonidiaformans</i> ATCC 25563             | 645951804  |
| Fusobacteria    | <i>Fusobacterium mortiferum</i> ATCC 9817                  | 646206254  |
| Fusobacteria    | <i>Fusobacterium nucleatum nucleatum</i> ATCC<br>23726     | 647000254  |
| Fusobacteria    | <i>Fusobacterium periodonticum</i> ATCC 33693              | 645951848  |

|                  |                                                      |           |
|------------------|------------------------------------------------------|-----------|
| Fusobacteria     | <i>Fusobacterium</i> sp. 11_3_2                      | 651324032 |
| Fusobacteria     | <i>Fusobacterium ulcerans</i> ATCC 49185             | 645951859 |
| Fusobacteria     | <i>Fusobacterium varium</i> ATCC 27725               | 646206275 |
| Fusobacteria     | <i>Leptotrichia buccalis</i> C-1013-b, DSM 1135      | 644736384 |
| Fusobacteria     | <i>Leptotrichia goodfellowii</i> F0264               | 647000268 |
| Fusobacteria     | <i>Leptotrichia hofstadii</i> F0254                  | 645951860 |
| Fusobacteria     | <i>Sebaldella termitidis</i> ATCC 33386              | 646311952 |
| Fusobacteria     | <i>Streptobacillus moniliformis</i> 9901, DSM 12112  | 646311956 |
| Gemmatimonadetes | <i>Gemmatimonas aurantiaca</i> T-27T                 | 643692024 |
| Lentisphaerae    | <i>Lentisphaera araneosa</i> HTCC2155                | 640963040 |
| Nitrospirae      | <i>Thermodesulfovibrio yellowstonii</i> DSM 11347    | 643348581 |
| Planctomycetes   | <i>Blastopirellula marina</i> SH 106T, DSM 3645      | 638341020 |
| Planctomycetes   | <i>Candidatus Kuenenia stuttgartiensis</i>           | 642555116 |
| Planctomycetes   | <i>Gemmata obscuriglobus</i> UQM 2246                | 641736268 |
| Planctomycetes   | <i>Isosphaera pallida</i> IS1B, ATCC 43644           | 649633058 |
| Planctomycetes   | <i>Pirellula staleyi</i> DSM 6068                    | 646311948 |
| Planctomycetes   | <i>Planctomyces brasiliensis</i> IFAM 1448, DSM 5305 | 649633083 |
| Planctomycetes   | <i>Planctomyces limnophilus</i> Mu 290, DSM 3776     | 646564559 |
| Planctomycetes   | <i>Planctomyces maris</i> DSM 8797                   | 640963032 |
| Planctomycetes   | <i>Rhodopirellula baltica</i> SH 1                   | 637000236 |
| Proteobacteria   | <i>Alcanivorax borkumensis</i> SK2                   | 637000004 |
| Proteobacteria   | <i>Anaeromyxobacter dehalogenans</i> 2CP-1           | 643348507 |
| Proteobacteria   | <i>Anaplasma phagocytophilum</i> HZ                  | 637000009 |
| Proteobacteria   | <i>Arcobacter nitrofigilis</i> DSM 7299              | 646564506 |
| Proteobacteria   | <i>Azoarcus</i> sp. BH72                             | 639633007 |
| Proteobacteria   | <i>Bartonella bacilliformis</i> KC583                | 639633009 |
| Proteobacteria   | <i>Bordetella bronchiseptica</i> RB50                | 637000032 |
| Proteobacteria   | <i>Brucella melitensis</i> ATCC 23457                | 643692012 |
| Proteobacteria   | <i>Burkholderia cenocepacia</i> AU 1054              | 637000046 |
| Proteobacteria   | <i>Caminiibacter mediatlanticus</i> TB-2             | 640963039 |
| Proteobacteria   | <i>Campylobacter concisus</i> 13826                  | 640753009 |
| Proteobacteria   | <i>Campylobacter fetus fetus</i> 82-40               | 639633016 |
| Proteobacteria   | <i>Campylobacter lari</i> RM2100                     | 643692014 |
| Proteobacteria   | <i>Candidatus Puniceispirillum marinum</i> IMCC1322  | 646564516 |
| Proteobacteria   | <i>Cellvibrio japonicus</i> Ueda107                  | 642555119 |
| Proteobacteria   | <i>Chromohalobacter salexigens</i> 1H11, DSM 3043    | 637000075 |
| Proteobacteria   | <i>Comamonas testosteroni</i> CNB-1                  | 646564523 |
| Proteobacteria   | <i>Cupriavidus taiwanensis</i> LMG 19424             | 644736347 |
| Proteobacteria   | <i>Dechloromonas aromatica</i> RCB                   | 637000088 |
| Proteobacteria   | <i>Desulfarculus baarsii</i> 2st14, DSM 2075         | 648028023 |
| Proteobacteria   | <i>Desulfobacterium autotrophicum</i> HRM2, DSM 3382 | 643692021 |

|                |                                                         |           |
|----------------|---------------------------------------------------------|-----------|
| Proteobacteria | <i>Desulfohalobium retbaense</i> HR100, DSM 5692        | 644736349 |
| Proteobacteria | <i>Desulfomicrobium baculatum</i> X, DSM 4028           | 644736350 |
| Proteobacteria | <i>Desulfonatospira thiodismutans</i> ASO3-1            | 643886196 |
| Proteobacteria | <i>Desulfovibrio magneticus</i> RS-1                    | 644736352 |
| Proteobacteria | <i>Desulfovibrio vulgaris</i> Miyazaki F                | 643348539 |
| Proteobacteria | <i>Desulfurivibrio alkaliphilus</i> AHT2                | 646564528 |
| Proteobacteria | <i>Dichelobacter nodosus</i> VCS1703A                   | 640427112 |
| Proteobacteria | <i>Dinoroseobacter shibae</i> DFL-12, DSM 16493         | 641228491 |
| Proteobacteria | <i>Erwinia amylovora</i> CFBP1430                       | 646564531 |
| Proteobacteria | <i>Erythrobacter litoralis</i> HTCC2594                 | 637000103 |
| Proteobacteria | <i>Escherichia coli</i> 55989                           | 643348544 |
| Proteobacteria | <i>Francisella philomiragia philomiragia</i> ATCC 25017 | 641522628 |
| Proteobacteria | <i>Geobacter sulfurreducens</i> KN400                   | 648231707 |
| Proteobacteria | <i>Geobacter uraniireducens</i> Rf4                     | 640427115 |
| Proteobacteria | <i>Haliangium ochraceum</i> SMP-2, DSM 14365            | 646311933 |
| Proteobacteria | <i>Helicobacter felis</i> CS1, ATCC 49179               | 649633054 |
| Proteobacteria | <i>Helicobacter mustelae</i> ATCC 43772                 | 646564537 |
| Proteobacteria | <i>Helicobacter pullorum</i> MIT 98-5489                | 643886218 |
| Proteobacteria | <i>Herbaspirillum seropedicae</i> SmR1                  | 648028033 |
| Proteobacteria | <i>Hyphomicrobium denitrificans</i> ATCC 51888          | 648028034 |
| Proteobacteria | <i>Hyphomonas neptunium</i> ATCC 15444                  | 637000135 |
| Proteobacteria | <i>Kangiella koreensis</i> SW-125, DSM 16069            | 644736377 |
| Proteobacteria | <i>Laribacter hongkongensis</i> HLHK9                   | 643692026 |
| Proteobacteria | <i>Lawsonia intracellularis</i> PHE/MN1-00              | 637000145 |
| Proteobacteria | <i>Legionella longbeachae</i> NSW150                    | 648028038 |
| Proteobacteria | <i>Magnetococcus</i> sp. MC-1                           | 639633036 |
| Proteobacteria | <i>Magnetospirillum magneticum</i> AMB-1                | 637000155 |
| Proteobacteria | <i>Mariprofundus ferrooxydans</i> PV-1                  | 639857004 |
| Proteobacteria | <i>Methylobacterium populi</i> BJ001                    | 642555139 |
| Proteobacteria | <i>Myxococcus fulvus</i> HW-1                           | 650716065 |
| Proteobacteria | <i>Nautilia profundicola</i> Am-H                       | 643692029 |
| Proteobacteria | <i>Neisseria lactamica</i> 020-06                       | 649633075 |
| Proteobacteria | <i>Neorickettsia risticii</i> Illinois                  | 644736395 |
| Proteobacteria | <i>Nitratifractor salsuginis</i> E9I37-1, DSM 16511     | 649633076 |
| Proteobacteria | <i>Nitratiruptor</i> sp. SB155-2                        | 640753037 |
| Proteobacteria | <i>Nitrobacter winogradskyi</i> Nb-255                  | 637000193 |
| Proteobacteria | <i>Nitrosococcus watsoni</i> C-113                      | 648028046 |
| Proteobacteria | <i>Nitrosomonas europaea</i> ATCC 19718                 | 637000195 |
| Proteobacteria | <i>Nitrosospira multiformis</i> ATCC 25196              | 637000197 |
| Proteobacteria | <i>Paracoccus denitrificans</i> PD1222                  | 639633048 |
| Proteobacteria | <i>Parvibaculum lavamentivorans</i> DS-1                | 640753040 |
| Proteobacteria | <i>Parvularcula bermudensis</i> HTCC2503                | 648028050 |
| Proteobacteria | <i>Pasteurella multocida multocida</i> Pm70             | 637000203 |
| Proteobacteria | <i>Pelobacter carbinolicus</i> DSM 2380                 | 637000204 |
| Proteobacteria | <i>Pelobacter propionicus</i> DSM 2379                  | 639633050 |

|                |                                                             |           |
|----------------|-------------------------------------------------------------|-----------|
| Proteobacteria | <i>Phenylobacterium zucineum</i> HLK1                       | 642555147 |
| Proteobacteria | <i>Polaromonas</i> sp. JS666                                | 637000208 |
| Proteobacteria | <i>Pseudomonas putida</i> BIRD-1                            | 650377963 |
| Proteobacteria | <i>Psychrobacter</i> sp. PRwf-1                             | 640427134 |
| Proteobacteria | <i>Pusillimonas</i> sp. T7-7                                | 650716078 |
| Proteobacteria | <i>Ralstonia pickettii</i> 12D                              | 644736400 |
| Proteobacteria | <i>Rhizobium rhizogenes</i> K84                             | 643348504 |
| Proteobacteria | <i>Rickettsia bellii</i> OSU 85-389                         | 640753044 |
| Proteobacteria | <i>Shewanella amazonensis</i> SB2B                          | 639633057 |
| Proteobacteria | <i>Starkeya novella</i> DSM 506                             | 648028054 |
| Proteobacteria | <i>Sulfurimonas autotrophica</i> OK10, DSM 16294            | 648028058 |
| Proteobacteria | <i>Sulfurospirillum deleyianum</i> 5175, DSM 6946           | 646311960 |
| Proteobacteria | <i>Syntrophobacter fumaroxidans</i> MPOB                    | 639633063 |
| Proteobacteria | <i>Syntrophus aciditrophicus</i> SB                         | 637000317 |
| Proteobacteria | <i>Thiobacillus denitrificans</i> ATCC 25259                | 637000324 |
| Proteobacteria | <i>Thiomonas intermedia</i> K12                             | 646564585 |
| Proteobacteria | <i>Tolumonas auensis</i> TA 4, DSM 9187                     | 643692052 |
| Proteobacteria | <i>Vibrio furnissii</i> 2510/74, NCTC 11218                 | 650377984 |
| Proteobacteria | Wolbachia endosymbiont of <i>Culex quinquefasciatus</i> Pel | 642555168 |
| Proteobacteria | <i>Yersinia pseudotuberculosis</i> IP 31758                 | 640753060 |
| Spirochaetes   | <i>Borrelia hermsii</i> DAH                                 | 642555108 |
| Spirochaetes   | <i>Borrelia spielmanii</i> A14S                             | 642791612 |
| Spirochaetes   | <i>Borrelia valaisiana</i> VS116                            | 641736181 |
| Spirochaetes   | <i>Brachyspira murdochii</i> 56-150, DSM 12563              | 646564514 |
| Spirochaetes   | <i>Leptospira borgpetersenii</i> sv Hardjo-bovis JB197      | 639633032 |
| Spirochaetes   | <i>Spirochaeta smaragdinae</i> SEBR 4228, DSM 11293         | 648028052 |
| Spirochaetes   | <i>Spirochaeta</i> sp. Buddy                                | 650377973 |
| Spirochaetes   | <i>Treponema azotonutricium</i> ZAS-9                       | 650716099 |
| Spirochaetes   | <i>Treponema brennaborensis</i> DSM 12168                   | 650716100 |
| Spirochaetes   | <i>Treponema phagedenis</i> F0421                           | 649990026 |
| Spirochaetes   | <i>Treponema vincentii</i> ATCC 35580                       | 645951869 |
| Synergistetes  | <i>Aminobacterium colombiense</i> ALA-1, DSM 12261          | 646564503 |
| Synergistetes  | <i>Jonquetella anthropi</i> E3_33 E1                        | 645951855 |
| Synergistetes  | <i>Thermanaerovibrio acidaminovorans</i> Su883, DSM 6589    | 646311961 |
| Thermi         | <i>Deinococcus deserti</i> VCD115                           | 643692020 |
| Thermi         | <i>Deinococcus geothermalis</i> DSM 11300                   | 641228488 |
| Thermi         | <i>Deinococcus maricopensis</i> LB-34, DSM 21211            | 649633034 |
| Thermi         | <i>Deinococcus proteolyticus</i> MRP, DSM 20540             | 649633035 |
| Thermi         | <i>Deinococcus radiodurans</i> USUHS (R1)                   | 637000092 |
| Thermi         | <i>Meiothermus ruber</i> 21, DSM 1279                       | 646564545 |
| Thermi         | <i>Meiothermus silvanus</i> VI-R2, DSM 9946                 | 646564546 |

|                 |                                                                               |            |
|-----------------|-------------------------------------------------------------------------------|------------|
| Thermi          | <i>Oceanithermus profundus</i> 506, DSM 14977                                 | 649633077  |
| Thermi          | <i>Thermus scotoductus</i> SA-01, ATCC 700910                                 | 649633105  |
| Thermi          | <i>Thermus thermophilus</i> HB27                                              | 637000322  |
| Thermi          | <i>Truepera radiovictrix</i> RQ-24, DSM 17093                                 | 646564586  |
| Thermotogae     | <i>Fervidobacterium nodosum</i> Rt17-B1                                       | 640753026  |
| Thermotogae     | <i>Kosmotoga olearia</i> TBF 19.5.1                                           | 644736379  |
| Thermotogae     | <i>Marinitoga piezophila</i> KA3                                              | 647533182  |
| Thermotogae     | <i>Mesotoga prima</i> MesG1.Ag.4.2                                            | 648276752  |
| Thermotogae     | <i>Petrotoga mobilis</i> SJ95                                                 | 641228500  |
| Thermotogae     | <i>Thermosipho africanus</i> TCF52B                                           | 643348583  |
| Thermotogae     | <i>Thermosipho melanesiensis</i> BI429                                        | 640753057  |
| Thermotogae     | <i>Thermotoga lettingae</i> TMO                                               | 641228511  |
| Thermotogae     | <i>Thermotoga naphthophila</i> RKU-10                                         | 646311964  |
| Thermotogae     | <i>Thermotoga neapolitana</i> DSM 4359                                        | 643348584  |
| Thermotogae     | <i>Thermotoga petrophila</i> RKU-1                                            | 640427150  |
| Verrucomicrobia | <i>Akkermansia muciniphila</i> ATCC BAA-835                                   | 642555104  |
| Verrucomicrobia | <i>Chthoniobacter flavus</i> Ellin428                                         | 642791618  |
| Verrucomicrobia | <i>Methylococcus thermophilus</i> V4                                          | 642555138  |
| Verrucomicrobia | <i>Opitutus terrae</i> PB90-1                                                 | 641522643  |
| Verrucomicrobia | <i>Verrucomicrobiales</i> sp. DG1235                                          | 647533243  |
| Verrucomicrobia | <i>Verrucomicrobium spinosum</i> DSM 4136                                     | 641736179  |
| Firmicutes      | <i>Anaerococcus prevotii</i> PC 1, DSM 20548                                  | 644736326  |
| Firmicutes      | <i>Lactobacillus gasseri</i> ATCC 33323                                       | 639633030  |
| Firmicutes      | <i>Listeria welshimeri</i> sv 6b, SLCC5334                                    | 639633035  |
| Firmicutes      | <i>Staphylococcus carnosus carnosus</i> TM300                                 | 643692037  |
| Proteobacteria  | <i>Acidithiobacillus caldus</i> SM-1                                          | 650716003  |
| Proteobacteria  | <i>Acidithiobacillus ferrooxidans</i> ATCC 23270                              | 643348501  |
| Proteobacteria  | <i>Bacteriovorax marinus</i> SJ                                               | 650377909  |
| Proteobacteria  | <i>Bdellovibrio bacteriovorus</i> HD100                                       | 637000030  |
| Proteobacteria  | <i>Buchnera aphidicola</i> (Cinara tujaefilina)                               | 650716012  |
| Proteobacteria  | <i>Candidatus Blochmannia floridanus</i>                                      | 637000056  |
| Proteobacteria  | <i>Wigglesworthia glossinidia</i> endosymbiont of <i>Glossina brevipalpis</i> | 637000338  |
| Spirochaetes    | <i>Candidatus Cloacamonas acidaminovorans</i>                                 | 642555115  |
| Aquificae       | <i>Sulfurihydrogenibium yellowstonense</i> SS-5                               | 645058708  |
| Caldiserica     | <i>Caldisericum exile</i> AZM16c01                                            | 2513237181 |
| Caldithrix      | <i>Caldithrix abyssi</i> DSM 13497                                            | 2513237181 |
| Chlorobi        | <i>Chlorobium ferrooxidans</i> DSM 13031                                      | 638341060  |
| Chrysiogenetes  | <i>Chrysiogenes arsenatis</i> DSM 11915                                       | 2005520001 |
| Crenarchaeota   | <i>Acidilobus saccharovorans</i> 345-15                                       | 648028003  |
| Crenarchaeota   | <i>Desulfurococcus kamchatkensis</i> 1221n                                    | 643348540  |
| Crenarchaeota   | <i>Desulfurococcus mucosus</i> 07/1, DSM 2162                                 | 649633040  |
| Crenarchaeota   | <i>Hyperthermus butylicus</i> DSM 5456                                        | 640069314  |
| Crenarchaeota   | <i>Ignicoccus hospitalis</i> KIN4/I, DSM 18386                                | 640753029  |
| Crenarchaeota   | <i>Ignisphaera aggregans</i> AQ1.S1, DSM 17230                                | 648028035  |
| Crenarchaeota   | <i>Metallosphaera sedula</i> DSM 5348                                         | 640427120  |
| Crenarchaeota   | <i>Pyrobaculum calidifontis</i> JCM 11548                                     | 640069326  |
| Crenarchaeota   | <i>Staphylothermus marinus</i> F1, DSM 3639                                   | 640069332  |



|               |                                                      |            |
|---------------|------------------------------------------------------|------------|
| Crenarchaeota | <i>Sulfolobus islandicus</i> HVE10/4                 | 650377981  |
| Crenarchaeota | <i>Sulfolobus tokodaii</i> 7, JCM 10545              | 638154519  |
| Crenarchaeota | <i>Thermofilum pendens</i> Hrk 5                     | 639633064  |
| Crenarchaeota | <i>Thermoproteus uzoniensis</i> 768-20               | 650716098  |
| Crenarchaeota | <i>Thermosphaera aggregans</i> M11TL, DSM 11486      | 646564583  |
| Crenarchaeota | <i>Vulcanisaeta moutnovskia</i> 768-28               | 650377985  |
| Cyanobacteria | <i>Arthrospira platensis</i> C1                      | 2507262036 |
| Cyanobacteria | <i>Cyanobacterium</i> sp. JSC-1                      | 2502171143 |
| Cyanobacteria | <i>Fischerella</i> sp. JSC-11                        | 2505679024 |
| Cyanobacteria | <i>Oscillatoriales</i> sp. JSC-12                    | 2510065010 |
| Cyanobacteria | <i>Synechococcus elongatus</i> PCC 7942              | 2514885031 |
| Cyanobacteria | <i>Synechococcus</i> sp. PE A4 65AY6A5               | 2512875021 |
| Cyanobacteria | <i>Synechococcus</i> sp. WH 8016                     | 2507262052 |
| Euryarchaeota | <i>Aciduliprofundum boonei</i> T469                  | 646564501  |
| Euryarchaeota | <i>Archaeoglobus fulgidus</i> VC-16, DSM 4304        | 638154502  |
| Euryarchaeota | <i>Archaeoglobus profundus</i> Av18, DSM 5631        | 646311906  |
| Euryarchaeota | <i>Candidatus Methanoregula boonei</i> 6A8           | 640753014  |
| Euryarchaeota | <i>Ferroglobus placidus</i> AEDII12DO, DSM 10642     | 646564534  |
| Euryarchaeota | <i>Halalkalicoccus jeotgali</i> B3, DSM 18796        | 648028029  |
| Euryarchaeota | <i>Haloarcula marismortui</i> ATCC 43049             | 638154503  |
| Euryarchaeota | <i>Halobacterium</i> sp. NRC-1                       | 638154504  |
| Euryarchaeota | <i>Haloferax volcanii</i> DS2, ATCC 29605            | 646564536  |
| Euryarchaeota | <i>Halogeometricum borinquense</i> PR3, DSM 11551    | 649633053  |
| Euryarchaeota | <i>Halomicrobium mukohataei</i> arg-2, DSM 12286     | 644736372  |
| Euryarchaeota | <i>Haloquadratum walsbyi</i> C23                     | 651053028  |
| Euryarchaeota | <i>Halorhabdus utahensis</i> AX-2, DSM 12940         | 644736373  |
| Euryarchaeota | <i>Halorubrum lacusprofundi</i> ATCC 49239           | 643692025  |
| Euryarchaeota | <i>Haloterrigena turkmenica</i> VKM B-1734, DSM 5511 | 646311934  |
| Euryarchaeota | <i>Methanobacterium</i> sp. AL-21                    | 650716052  |
| Euryarchaeota | <i>Methanobrevibacter ruminantium</i> M1             | 646311943  |
| Euryarchaeota | <i>Methanobrevibacter smithii</i> PS, ATCC 35061     | 640427121  |
| Euryarchaeota | <i>Methanocaldococcus fervens</i> AG86               | 644736385  |
| Euryarchaeota | <i>Methanocaldococcus infernus</i> ME                | 646564547  |
| Euryarchaeota | <i>Methanocaldococcus jannaschii</i> DSM 2661        | 638154505  |
| Euryarchaeota | <i>Methanocaldococcus</i> sp. FS406-22               | 646564548  |
| Euryarchaeota | <i>Methanocaldococcus vulcanius</i> M7, DSM 12094    | 646311944  |
| Euryarchaeota | <i>Methanocella paludicola</i> SANAE                 | 646311945  |
| Euryarchaeota | <i>Methanocella</i> sp. RC-I                         | 640427153  |
| Euryarchaeota | <i>Methanococcoides burtonii</i> DSM 6242            | 637000161  |
| Euryarchaeota | <i>Methanococcus aeolicus</i> Nankai-3               | 640753034  |
| Euryarchaeota | <i>Methanococcus maripaludis</i> C5                  | 640069316  |
| Euryarchaeota | <i>Methanococcus vanniellii</i> SB                   | 640753036  |

|               |                                                          |            |
|---------------|----------------------------------------------------------|------------|
| Euryarchaeota | <i>Methanococcus voltae</i> A3                           | 646564549  |
| Euryarchaeota | <i>Methanocorpusculum labreanum</i> Z                    | 640069317  |
| Euryarchaeota | <i>Methanoculleus marisnigri</i> JR1, DSM 1498           | 640069318  |
| Euryarchaeota | <i>Methanohalobium evestigatum</i> Z-7303, DSM 3721      | 648028039  |
| Euryarchaeota | <i>Methanohalophilus mahii</i> SLP, DSM 5219             | 646564550  |
| Euryarchaeota | <i>Methanoplanus petrolearius</i> SEBR 4847, DSM 11571   | 648028040  |
| Euryarchaeota | <i>Methanopyrus kandleri</i> AV19                        | 638154507  |
| Euryarchaeota | <i>Methanosaeta concilii</i> GP6                         | 650716054  |
| Euryarchaeota | <i>Methanosaeta thermophila</i> PT                       | 639633038  |
| Euryarchaeota | <i>Methanosarcina acetivorans</i> C2A                    | 638154508  |
| Euryarchaeota | <i>Methanosarcina barkeri</i> Fusaro, DSM 804            | 637000162  |
| Euryarchaeota | <i>Methanosarcina mazei</i> Go1, DSM 3647                | 638154509  |
| Euryarchaeota | <i>Methanosphaera stadtmanae</i> DSM 3091                | 637000163  |
| Euryarchaeota | <i>Methanosphaerula palustris</i> E1-9c, DSM 19958       | 643348525  |
| Euryarchaeota | <i>Methanospirillum hungatei</i> JF-1                    | 637000164  |
| Euryarchaeota | <i>Methanothermobacter marburgensis</i> Marburg DSM 2133 | 648028041  |
| Euryarchaeota | <i>Methanothermobacter thermoautotrophicus</i> Delta H   | 638154510  |
| Euryarchaeota | <i>Methanothermococcus okinawensis</i> IH1               | 650716055  |
| Euryarchaeota | <i>Methanothermus fervidus</i> V24S, DSM 2088            | 649633067  |
| Euryarchaeota | <i>Methanotorris igneus</i> Kol 5                        | 650716056  |
| Euryarchaeota | <i>Natrialba magadii</i> ATCC 43099                      | 646564555  |
| Euryarchaeota | <i>Natronomonas pharaonis</i> Gabara, DSM 2160           | 637000187  |
| Euryarchaeota | <i>Picrophilus torridus</i> DSM 9790                     | 638154512  |
| Euryarchaeota | <i>Pyrococcus abyssi</i> GE5                             | 638154514  |
| Euryarchaeota | <i>Pyrococcus furiosus</i> DSM 3638                      | 638154515  |
| Euryarchaeota | <i>Pyrococcus horikoshii</i> OT3                         | 638154516  |
| Euryarchaeota | <i>Pyrococcus</i> sp. NA2                                | 650716079  |
| Euryarchaeota | <i>Pyrococcus yayanosii</i> CH1                          | 650716080  |
| Euryarchaeota | <i>Thermococcus barophilus</i> MP                        | 650716096  |
| Euryarchaeota | <i>Thermococcus gammatolerans</i> EJ3                    | 644736411  |
| Euryarchaeota | <i>Thermococcus kodakarensis</i> KOD1                    | 638154520  |
| Euryarchaeota | <i>Thermococcus onnurineus</i> NA1                       | 643348580  |
| Euryarchaeota | <i>Thermococcus sibiricus</i> MM 739                     | 644736412  |
| Euryarchaeota | <i>Thermococcus</i> sp. 4557                             | 650716097  |
| Euryarchaeota | <i>Thermoplasma acidophilum</i> DSM 1728                 | 638154521  |
| Euryarchaeota | <i>Thermoplasma volcanium</i> GSS1                       | 638154522  |
| Fibrobacteres | <i>Fibrobacter succinogenes succinogenes</i> S85         | 650377942  |
| Firmicutes    | <i>Eubacterium cylindroides</i> T2-87                    | 650377935  |
| Firmicutes    | <i>Thermodesulfobium narugense</i> Na82, DSM 14796       | 2504756006 |
| Fusobacteria  | <i>Fusobacterium necrophorum funduliforme</i> 1 1 36S    | 2513237330 |
| Fusobacteria  | <i>Fusobacterium</i> sp. oral taxon 370 str. F0437       | 2513237336 |

|                  |                                                   |                  |
|------------------|---------------------------------------------------|------------------|
| Fusobacteria     | <i>Ilyobacter polytropus</i> CuHBu1, DSM 2926     | 649633056        |
| Fusobacteria     | <i>Leptotrichia goodfellowii</i> LB 57, DSM 19756 | 2506520045       |
| Fusobacteria     | <i>Leptotrichia shahii</i> DSM 19757              | 2515154071       |
| Fusobacteria     | <i>Leptotrichia wadei</i> DSM 19758               | 2515154120       |
| Korarchaeota     | <i>Candidatus</i> Korarchaeum cryptofilum OPF8    | 641522611        |
| Nanoarchaeota    | <i>Nanoarchaeum equitans</i> Kin4-M               | 638154511        |
| Nitrospirae      | <i>Candidatus</i> Nitrospira defluvii             | 649633030        |
| Nitrospirae      | <i>Leptospirillum ferrooxidans</i> C2-3           | 2540341086       |
| OP10             | <i>Chthonomonas calidirosea</i> T49               | 2503242004       |
| OP9              | <i>Caldatribacterium</i> OP9-cSCG                 | APKF0000000<br>0 |
| Saccharibacteria | <i>Candidatus</i> Saccharimonas aalborgensis      | CP005957.1       |
| Thaumarchaeota   | <i>Cenarchaeum symbiosum</i> A                    | 641522613        |
| Thaumarchaeota   | <i>Nitrosopumilus maritimus</i> SCM1              | 641228499        |
| Verrucomicrobia  | <i>Opitutaceae</i> sp. TAV2                       | 640963002        |
| WWE1             | <i>Candidatus</i> Cloacamonas acidaminovorans     | 642555115        |

**Table S5. Genes belong to pathways or assemblages from the Melainabacteria representatives from this study**

Listed are the IMG gene IDs for each of the Melainabacteria that are deposited in IMG.

|                                                        |                       | <i>Symbol</i> | <i>Candidatus</i><br><i>Gastroanaerophila</i><br><i>phascolarctos</i> | <i>Zag_1</i> | <i>Zag_111</i>           | <i>MH_37</i> | <i>Candidatus</i><br><i>Obscuribacter</i><br><i>phosphatis</i> | <i>Candidatus</i><br><i>Caenarcenophila</i><br><i>bioreactus</i> |
|--------------------------------------------------------|-----------------------|---------------|-----------------------------------------------------------------------|--------------|--------------------------|--------------|----------------------------------------------------------------|------------------------------------------------------------------|
| <b>EMP pathway</b>                                     | <b>E.C<br/>number</b> |               |                                                                       |              |                          |              |                                                                |                                                                  |
| Glucokinase                                            | 2.7.1.2               | GK            | 2523622275                                                            | 2523618351   | 2534657128<br>2534657723 | 2522811268   | 2541282499<br>2541283255                                       | -                                                                |
| Glucose-6-phosphate<br>isomerase                       | 5.3.1.9               | GPI           | 2523621784                                                            | 2523618311   | 2534656686               | 2522811348   | -                                                              | 2554235349                                                       |
| Phosphofructokinase                                    | 2.7.1.11              | PFK           | -                                                                     | -            | 2534656845               | -            | 2541281805                                                     | 2554235646                                                       |
| Fructose-bisphosphate<br>aldolase                      | 4.1.2.13              | fbaA          | 2523623187                                                            | 2523617884   | 2534656936               | 2522812428   | 2541285301                                                     | 2554235409                                                       |
| Triosephosphate<br>isomerase                           | 5.3.1.1               | TPI           | 2523623082                                                            | 2523617328   | 2534658147               | 2522812616   | 2541284414                                                     | 2554236361                                                       |
| Glyceraldehyde-3-<br>phosphate dehydrogenase           | 1.2.1.12              | GAP           | 2523622612                                                            | 2523617047   | 2534657629               | -            | 2541285214                                                     | 2554236616                                                       |
| Phosphoglycerate kinase                                | 2.7.2.3               | PGK           | 2523621953                                                            | 2523618679   | 2534656945               | 2522812014   | 2541285215                                                     | 2554235911                                                       |
| Phosphoglycerate mutase                                | 5.4.2.1               | PGM           | 2523622862                                                            | 2523618262   | 2534656858               | 2522813130   | 2541282187                                                     | 2554235338                                                       |
| Enolase                                                | 4.2.1.11              | ENO           | 2523623115                                                            | 2523618038   | 2534656767               | 2522811435   | 2541282164                                                     | -                                                                |
| Pyruvate kinase                                        | 2.7.1.40              | PK            | 2523622478                                                            | 2523618904   | 2534656599               | 2522811367   | 2541285471                                                     | 2554235818                                                       |
|                                                        |                       |               |                                                                       |              |                          |              |                                                                |                                                                  |
| <b>Fermentation</b>                                    |                       |               |                                                                       |              |                          |              |                                                                |                                                                  |
| Acetaldehyde<br>dehydrogenase/alcohol<br>dehydrogenase | 1.2.1.10/1.<br>1.1.1  | ALDH/AD<br>H  | 2523622361                                                            | 2523617074   | 2534658922               | 2522812406   | 2541282950                                                     | 2554235808                                                       |
| Alcohol dehydrogenase,<br>class IV                     | 1.1.1.1               | ADH           | 2523621842                                                            | 2523617291   | 2534657773               | 2522812145   | 2541282501                                                     | 2554235925                                                       |
| Lactate dehydrogenase                                  | 1.1.1.28              | LDH           | 2523621888                                                            | 2523618732   | 2534657873               | 2522811332   | 2541281883                                                     | 2554236386                                                       |
| Pyruvate formate lyase                                 | 2.3.1.54              | PFL           | 2523622898                                                            | -            | 2534656682               | -            | -                                                              | -                                                                |

|                                   |          |      |                          |                          |                          |                                                                                  |                          |                                                                                                                                                                                                                                                   |  |
|-----------------------------------|----------|------|--------------------------|--------------------------|--------------------------|----------------------------------------------------------------------------------|--------------------------|---------------------------------------------------------------------------------------------------------------------------------------------------------------------------------------------------------------------------------------------------|--|
|                                   |          |      |                          |                          |                          |                                                                                  |                          |                                                                                                                                                                                                                                                   |  |
| <b>Pentose phosphate pathway</b>  |          |      |                          |                          |                          |                                                                                  |                          |                                                                                                                                                                                                                                                   |  |
| Glucose-6-phosphate dehydrogenase | 1.1.1.49 | G6PD | -                        | -                        | -                        | -                                                                                | 2541282512               | -                                                                                                                                                                                                                                                 |  |
| 6-phosphogluconolactonase         | 3.1.1.31 | PGLS | -                        | -                        | -                        | -                                                                                | 2541282514               | -                                                                                                                                                                                                                                                 |  |
| 6-phosphogluconate dehydrogenase  | 1.1.1.44 | PGD  | -                        | -                        | -                        | -                                                                                | 2541282515               | -                                                                                                                                                                                                                                                 |  |
| Ribulose-5-phosphate 3-Epimerase  | 5.1.3.1  | RPE  | 2523623171               | 2523619049               | 2534656104<br>2534657714 | 2522811657                                                                       | 2541282203               | 2554235427                                                                                                                                                                                                                                        |  |
| Ribose-5-phosphate Isomerase      | 5.3.1.6  | RPI  | 2523621712               | 2523619138               | 2534657230               | 2522811997                                                                       | 2541282259               | 2554235504                                                                                                                                                                                                                                        |  |
| Transketolase                     | 2.2.1.1  | TKT  | 2523622052<br>2523621794 | 2523618017<br>2523618410 | 2534656618<br>2534657589 | 2522812113<br>2522812117<br>2522812264<br>2522812114<br>2522812118<br>2522813495 | 2541283291               | 2554236287<br>2554235334                                                                                                                                                                                                                          |  |
| Transaldolase                     | 2.2.1.2  | TAL  | -                        | -                        | -                        | -                                                                                | 2541281904               | 2554236185<br><a href="https://img.jgi.doe.gov/cgi-bin/er/main.cgi?section=GeneDetail&amp;page=geneDetail&amp;gene_oid=2534659562">https://img.jgi.doe.gov/cgi-bin/er/main.cgi?section=GeneDetail&amp;page=geneDetail&amp;gene_oid=2534659562</a> |  |
|                                   |          |      |                          |                          |                          |                                                                                  |                          |                                                                                                                                                                                                                                                   |  |
| <b>TCA cycle</b>                  |          |      |                          |                          |                          |                                                                                  |                          |                                                                                                                                                                                                                                                   |  |
| Pyruvate dehydrogenase            | 1.2.4.1  | PDK  | -                        | -                        | -                        | -                                                                                | 2541283534<br>2541283535 | -                                                                                                                                                                                                                                                 |  |
| Citrate synthase                  | 2.3.3.1  | CS   | -                        | -                        | -                        | -                                                                                | 2541282238               | -                                                                                                                                                                                                                                                 |  |
| Aconitase                         | 4.2.1.3  | ACO  | -                        | -                        | -                        | -                                                                                | 2541284223               | -                                                                                                                                                                                                                                                 |  |

|                                                   |          |       |                                                                                  |                                        |                                        |                                        |                                                      |            |
|---------------------------------------------------|----------|-------|----------------------------------------------------------------------------------|----------------------------------------|----------------------------------------|----------------------------------------|------------------------------------------------------|------------|
| Isocitrate dehydrogenase                          | 1.1.1.41 | IDH   | -                                                                                | 2523618070                             | 2534657368                             | 2522811358                             |                                                      | 2554236132 |
| Isocitrate dehydrogenase                          | 1.1.1.42 | IDH   | -                                                                                | -                                      | -                                      | -                                      | 2541284187<br>2541284595                             | -          |
| 2-oxoacid:ferredoxin oxidoreductase               | 1.2.7.3  | OFOR  | 2523622373<br>2523622374<br>2523622375<br>2523622658<br>2523622659<br>2523622660 | 2523617943<br>2523617944<br>2523617945 | 2534657734<br>2534657735<br>2534657736 | 2522812645<br>2522812646<br>2522812647 | 2541281896<br>2541281897<br>2541282395<br>2541282396 | -          |
| Succinyl-CoA synthetase                           | 6.2.1.5  | SCS   | -                                                                                | -                                      | -                                      | -                                      | 2541282222<br>2541282223                             | -          |
| Succinate dehydrogenase                           | 1.3.5.1  | SDH   | -                                                                                | -                                      | -                                      | -                                      | 2541284229<br>2541284230                             | -          |
| Fumarase                                          | 4.2.1.2  | FH    | -                                                                                | -                                      | -                                      | -                                      | 2541282719                                           | -          |
| Malate dehydrogenase                              | 1.1.1.37 | MDH   | -                                                                                | -                                      | -                                      | -                                      | 2541284440                                           | -          |
| Phosphoenolpyruvate carboxykinase                 | 4.1.1.32 | PEPCK | -                                                                                | -                                      | -                                      | -                                      | 2541283468                                           | -          |
| <b>Electron transport chain</b>                   |          |       |                                                                                  |                                        |                                        |                                        |                                                      |            |
| Predicted nucleoside-diphosphate-sugar epimerases | 1.6.99.3 | -     | -                                                                                | -                                      | -                                      | -                                      | 2541282363<br>2541284393                             | -          |
| NADH dehydrogenase subunit A                      | 1.6.5.3  | nuoA  | -                                                                                | -                                      | -                                      | -                                      | 2541285507                                           | -          |
| NADH dehydrogenase subunit B                      | 1.6.5.3  | nuoB  | -                                                                                | -                                      | -                                      | -                                      | 2541285508                                           | -          |
| NADH:ubiquinone oxidoreductase 27 kD subunit      | 1.6.5.3  | nuoC  | -                                                                                | -                                      | -                                      | -                                      | 2541285509                                           | -          |
| NADH:ubiquinone oxidoreductase 49 kD subunit 7    | 1.6.5.3  | nuoD  | -                                                                                | -                                      | -                                      | -                                      | 2541285510                                           | -          |

|                                                                                                                          |                  |      |   |            |            |            |            |            |
|--------------------------------------------------------------------------------------------------------------------------|------------------|------|---|------------|------------|------------|------------|------------|
| NADH:ubiquinone oxidoreductase 24 kD subunit                                                                             | 1.6.5.3          | nuoE | - | 2523617688 | 2534659396 | 2522812754 | -          | 2554235204 |
| NAD(P)-dependent iron-only hydrogenase diaphorase component flavavoprotein                                               | 1.6.5.3          | nuoF | - | 2523617687 | 2534659397 | 2522812755 | -          | 2554235203 |
| NAD(P)-dependent iron-only hydrogenase catalytic subunit                                                                 | 1.6.5.3          | nuoG | - | 2523617686 | 2534659398 | 2522812756 | -          | 2554235202 |
| NADH dehydrogenase subunit H                                                                                             | 1.6.5.3          | nuoH | - | -          | -          | -          | 2541285511 | -          |
| NADH-quinone oxidoreductase, chain I                                                                                     | 1.6.5.3          | nuoI | - | -          | -          | -          | 2541285512 | -          |
| NADH dehydrogenase subunit L                                                                                             | 1.6.5.3          | nuoL | - | -          | -          | -          | 2541281894 | -          |
| Proton-translocating NADH-quinone oxidoreductase, chain M                                                                | -                | nuoM | - | -          | -          | -          | 2541281893 | -          |
| NADH dehydrogenase subunit N                                                                                             | 1.6.5.3          | nuoN | - | -          | -          | -          | 2541283929 | -          |
| NADH:ubiquinone oxidoreductase subunit 5 (chain L)/Multisubunit Na <sup>+</sup> /H <sup>+</sup> antiporter, MnhA subunit | 1.6.5.3          | ndhF | - | -          | -          | -          | 2541284457 | -          |
| NADH:ubiquinone oxidoreductase subunit 6 (chain J)                                                                       | 1.6.5.3          | ndhG | - | -          | -          | -          | 2541285513 | -          |
| Succinate dehydrogenase subunit A                                                                                        | 1.3.5.1/1.3.99.1 | sdhA | - | -          | -          | -          | 2541284229 | -          |
| Succinate dehydrogenase subunit B                                                                                        | 1.3.5.1/1.3.99.1 | sdhB | - | -          | -          | -          | 2541284230 | -          |





|                                                               |  |      |                          |            |            |            |   |            |
|---------------------------------------------------------------|--|------|--------------------------|------------|------------|------------|---|------------|
|                                                               |  |      |                          |            |            |            |   |            |
| <b>Flagella assembly</b>                                      |  |      |                          |            |            |            |   |            |
| Flagella basal body P-ring formation protein FlgA             |  | FlgA | -                        | -          | -          | -          | - | -          |
| flagellar basal-body rod protein FlgB                         |  | FlgB | 2523621836               | 2523618479 | 2534656302 | 2522812505 | - | -          |
| flagellar basal-body rod protein FlgC                         |  | FlgC | 2523621835               | 2523618478 | 2534656301 | 2522812504 | - | -          |
| Flagellar hook capping protein                                |  | FlgD | -                        | -          | -          | -          | - | -          |
| flagellar hook-basal body protein FlgE                        |  | FlgE | -                        | -          | -          | -          | - | -          |
| flagellar hook-basal body rod protein FlgF                    |  | FlgF | -                        | 2523618481 | 2534656304 | -          | - | -          |
| flagellar basal-body rod protein FlgG, Gram-negative bacteria |  | FlgG | 2523621837<br>2523621838 | 2523618480 | 2534656303 | 2522812506 | - | -          |
| Flagellar basal body L-ring protein                           |  | FlgH | -                        | -          | -          | -          | - | -          |
| Flagellar basal-body P-ring protein                           |  | FlgI | -                        | -          | -          | -          | - | -          |
| Flagellar protein FlgJ                                        |  | FlgJ | -                        | -          | -          | -          | - | -          |
| Flagellar hook-associated protein FlgK                        |  | FlgK | -                        | -          | -          | -          | - | -          |
| flagellar hook-associated protein 3                           |  | FlgL | -                        | -          | -          | -          | - | -          |
| FlgN                                                          |  | FlgN | -                        | -          | -          | -          | - | -          |
| Flagellar biosynthesis pathway, component FlhA                |  | FlhA | 2523622290               | 2523618233 | 2534658234 | 2522812376 | - | 2554236289 |
| Flagellar biosynthesis pathway, component FlhB                |  | FlhB | 2523621565               | 2523617711 | 2534656770 | 2522811979 | - | 2554235321 |

|                                                                              |  |           |            |                          |            |            |   |            |
|------------------------------------------------------------------------------|--|-----------|------------|--------------------------|------------|------------|---|------------|
| Flagellin and related hook-associated proteins                               |  | FliC      | -          | -                        | -          | -          | - | -          |
| Flagellar capping protein                                                    |  | FliD      | -          | -                        | -          | -          | - | -          |
| flagellar hook-basal body complex protein FliE                               |  | FliE      | 2523622294 | 2523618229               | -          | 2522812380 | - | -          |
| flagellar basal-body M-ring protein/flagellar hook-basal body protein (fliF) |  | FliF      | -          | -                        | -          | -          | - | -          |
| Flagellar motor switch protein FliG                                          |  | FliG      | -          | -                        | -          | -          | - | -          |
| Flagellar biosynthesis/type III secretory pathway protein                    |  | FliH      | -          | -                        | -          | -          | - | -          |
| type III secretion system ATPase, FliI/YscN (EC 3.6.3.15)                    |  | FliI      | 2523621472 | 2523618466<br>2523619149 | 2534657369 | 2522811726 | - | 2554236374 |
| flagellar export protein FliJ                                                |  | FliJ      | 2523621613 | 2523618709               | -          | 2522811828 | - | -          |
| Flagellar hook-length control protein FliK                                   |  | FliK      | -          | -                        | -          | -          | - | -          |
| Flagellar basal body-associated protein                                      |  | FliL      | -          | -                        | -          | -          | - | -          |
| Flagellar motor switch protein FliM                                          |  | FliM      | -          | -                        | -          | -          | - | -          |
| Flagellar motor switch protein FliN                                          |  | FliN/SpoA | -          | -                        | -          | -          | - | -          |
| Flagellar biosynthesis protein, FliO                                         |  | FliO      | -          | -                        | -          | -          | - | -          |
| Flagellar biosynthesis pathway, component FliP                               |  | FliP      | 2523622788 | 2523618755               | 2534657253 | 2522811903 | - | 2554235810 |
| Flagellar biosynthesis pathway, component FliQ                               |  | FliQ      | -          | -                        | -          | -          | - | -          |

|                                                                          |           |      |            |            |            |            |            |            |
|--------------------------------------------------------------------------|-----------|------|------------|------------|------------|------------|------------|------------|
| Flagellar biosynthesis pathway, component FliR                           |           | FliR | 2523622786 | 2523618758 | 2534657251 | 2522812209 | -          | 2554235468 |
| flagellar biosynthetic protein FliS                                      |           | FliS | -          | -          | -          | -          | -          | -          |
| Flagellar protein FliT                                                   |           | FliT | -          | -          | -          | -          | -          | -          |
| Flagella motor component                                                 |           | MotA | -          | -          | -          | -          | -          | -          |
| Flagella motor protein                                                   |           | MotB | -          | -          | -          | -          | -          | -          |
| Flagellar motor protein                                                  |           | OmpA | -          | -          | 2534656717 | -          | -          | -          |
|                                                                          |           |      |            |            |            |            |            |            |
| <b>Hydrogenases</b>                                                      |           |      |            |            |            |            |            |            |
| [FeFe] hydrogenase H-cluster radical SAM maturase HydE                   | 2.8.1.6   | HydE | -          | -          | 2534657619 | 2522813318 | -          | 2554235784 |
| iron-only hydrogenase maturation protein HydF                            | -         | HydF | -          | 2523618604 | 2534656733 | 2522811229 | -          | 2554235601 |
| iron-only hydrogenase maturation protein HydG                            | -         | HydG | -          | 2523617045 | 2534657108 | 2522813171 | -          | 2554235630 |
| [FeFe] hydrogenase, group B1/B3                                          | -         | -    | -          | -          | 2534657038 | 2522811239 | -          | -          |
| Iron only hydrogenase large subunit, C-terminal domain                   | -         | -    | -          | 2523617266 | 2534657035 | 2522811236 | -          | -          |
| NAD(P)-dependent iron-only hydrogenase diaphorase component flavoprotein | 1.6.5.3   | -    | -          | 2523617687 | 2534657247 | 2522812755 | -          | 2554235203 |
| NAD(P)-dependent iron-only hydrogenase catalytic subunit                 | 1.6.5.3   | -    | -          | 2523617686 | 2534657246 | 2522812756 | -          | 2554235202 |
| Ni,Fe-hydrogenase I small subunit                                        | 1.12.99.6 | -    | -          | -          | -          | -          | 2541282828 | -          |

|                                                                          |           |           |            |   |            |   |                          |   |
|--------------------------------------------------------------------------|-----------|-----------|------------|---|------------|---|--------------------------|---|
| Ni,Fe-hydrogenase I large subunit                                        | 1.12.99.6 | -         | -          | - | -          | - | 2541282829               | - |
| hydrogenase maturation protease                                          | -         | HycI      | -          | - | -          | - | 2541282830               | - |
| Ni,Fe-hydrogenase III small subunit                                      | -         | -         | 2523623068 | - | -          | - | 2541283385               | - |
| Ni,Fe-hydrogenase III large subunit                                      | -         | -         | 2523623069 | - | -          | - | 2541283386               | - |
| Hydrogenase 4 membrane component (E)                                     | 1.-       | -         | 2523623071 | - | -          | - | 2541283388               | - |
| Coenzyme F420-reducing hydrogenase, alpha subunit                        | -         | -         | -          | - | -          | - | 2541281832               | - |
| Coenzyme F420-reducing hydrogenase, beta subunit                         | -         | -         | -          | - | 2534657715 | - | -                        | - |
| Coenzyme F420-reducing hydrogenase, delta subunit                        | -         | -         | -          | - | -          | - | 2541285052               | - |
| Coenzyme F420-reducing hydrogenase, gamma subunit                        | -         | -         | -          | - | -          | - | 2541281831               | - |
| Zn finger protein HypA/HybF (possibly regulating hydrogenase expression) | -         | HypA/HybF | -          | - | -          | - | 2541282821               | - |
| Hydrogenase nickel incorporation protein HypB                            | -         | HypB      | -          | - | -          | - | 2541282820               | - |
| Hydrogenase maturation protein HypC                                      | -         | HypC      | -          | - | -          | - | 2541282822               | - |
| Hydrogenase maturation protein HypD                                      | -         | HypD      | -          | - | -          | - | 2541282823<br>2541285008 | - |
| Hydrogenase maturation                                                   | -         | HypE      | -          | - | -          | - | 2541282825               | - |

|                                                           |          |      |            |            |            |            |            |            |
|-----------------------------------------------------------|----------|------|------------|------------|------------|------------|------------|------------|
| protein, carbamoyl dehydratase HypE                       |          |      |            |            |            |            |            |            |
| Hydrogenase maturation protein, carbamoyltransferase HypF | -        | HypF | -          | -          | -          | -          | 2541282826 | -          |
|                                                           |          |      |            |            |            |            |            |            |
| <b>Polyphosphate metabolism</b>                           |          |      |            |            |            |            |            |            |
| Polyphosphate kinase                                      | -        | -    | -          | -          | -          | 2522813547 | -          | -          |
| polyphosphate kinase 1                                    | 2.7.4.1  | -    | -          | -          | -          | -          | 2541282432 | -          |
| polyphosphate kinase 2, PA0141 family                     | -        | -    | -          | -          | -          | -          | 2541282023 | -          |
| Polyphosphate:AMP phosphotransferase                      | 2.7.4.-  | -    | -          | -          | -          | -          | 2541284980 | -          |
| Guanosine polyphosphate pyrophosphohydrolases/synthetases | 3.1.7.2  | -    | 2523622599 | 2523617618 | 2534656623 | -          | 2541284760 | -          |
| Exopolyphosphatase                                        | 3.6.1.11 | -    | -          | -          | -          | -          | 2541282351 | -          |
| Adenylate kinase                                          | 2.7.4.3  | -    | 2523623169 | 2523616999 | 2534657048 | 2522813109 | 2541282076 | 2554235454 |

**Table S6. Genomes used to produce the flagella gene tree**

Listed are the IMG taxon ID, the organism name and the phylum that the organism belongs to.

| <b>IMG taxon ID</b> | <b>Organism</b>                                              | <b>Phylum</b>  |
|---------------------|--------------------------------------------------------------|----------------|
| 643692001           | <i>Acidobacterium capsulatum</i> ATCC 51196                  | Acidobacteria  |
| 649633100           | <i>Terriglobus saanensis</i> SP1PR4, DSM 23119               | Acidobacteria  |
| 642555107           | <i>Bifidobacterium longum</i> DJO10A                         | Actinobacteria |
| 2508501106          | <i>Mycobacterium rhodesiae</i> NBB3                          | Actinobacteria |
| 2517434006          | <i>Brevibacterium casei</i> S18                              | Actinobacteria |
| 646564582           | <i>Thermocrinis albus</i> HI 11/12, DSM 14484                | Aquificae      |
| 643692050           | <i>Sulfurihydrogenibium azorense</i> Az-Fu1                  | Aquificae      |
| 649633104           | <i>Thermovibrio ammonificans</i> HB-1, DSM 15698             | Aquificae      |
| 2511231141          | <i>Alicyclobacillus acidocaldarius acidocaldarius</i> Tc-4-1 | Bacillus       |
| 649633013           | <i>Bacteroides salanitronis</i> BL78, DSM 18170              | Bacteroides    |
| 640753008           | <i>Bacteroides vulgatus</i> ATCC 8482                        | Bacteroides    |
| 637000065           | <i>Chlamydomphila abortus</i> S26/3                          | Chlamydia      |
| 637000067           | <i>Chlamydomphila felis</i> Fe/C-56                          | Chlamydia      |
| 646564588           | <i>Waddlia chondrophila</i> WSU 86-1044                      | Chlamydia      |
| 637000073           | <i>Chlorobium tepidum</i> TLS                                | Chlorobi       |
| 637000072           | <i>Chlorobium chlorochromatii</i> CaD3                       | Chlorobi       |
| 642555122           | <i>Chlorobium phaeobacteroides</i> BS1                       | Chlorobi       |
| 2508501111          | <i>Herpetosiphon aurantiacus</i> DSM 785                     | Chloroflexi    |
| 649989977           | <i>Oscillochloris trichoides</i> DG6                         | Chloroflexi    |
| 649633005           | <i>Anaerolinea thermophila</i> UN-1                          | Chloroflexi    |
| 649633038           | <i>Desulfurispirillum indicum</i> S5, DSM 22839              | Chrysiogenetes |
| 637000076           | <i>Clostridium acetobutylicum</i> ATCC 824                   | Clostridia     |
| 2503508009          | <i>Mahella australiensis</i> 50-1 BON, DSM 15567             | Clostridia     |
| 641522632           | <i>Heliobacterium modesticaldum</i> Ice1                     | Clostridia     |
| 649633052           | <i>Halanaerobium hydrogeniformans</i>                        | Clostridia     |
| 640427120           | <i>Metallosphaera sedula</i> DSM 5348                        | Crenarchaeota  |
| 641228499           | <i>Nitrosopumilus maritimus</i> SCM1                         | Crenarchaeota  |
| 648028062           | <i>Vulcanisaeta distributa</i> DSM 14429                     | Crenarchaeota  |
| 2503982047          | <i>Anabaena cylindrica</i> PCC 7122                          | Cyanobacteria  |
| 639857037           | <i>Nodularia spumigena</i> CCY9414                           | Cyanobacteria  |
| 637000313           | <i>Synechococcus</i> sp. JA-3-3Ab                            | Cyanobacteria  |
| 637000121           | <i>Gloeobacter violaceus</i> PCC 7421                        | Cyanobacteria  |
| 2523533517          | Zag_1                                                        | Cyanobacteria  |
| 2531839741          | Zag_111                                                      | Cyanobacteria  |
| 2523533519          | <i>Ca. Gastranaerophilus phascolarctosicola</i>              | Cyanobacteria  |
| 2522572068          | MH_37                                                        | Cyanobacteria  |
| 2541046959          | Mel_A1                                                       | Cyanobacteria  |

|            |                                                          |                  |
|------------|----------------------------------------------------------|------------------|
| 2541046956 | Mel_B1                                                   | Cyanobacteria    |
| 2541046940 | Mel_B2                                                   | Cyanobacteria    |
| 2541046938 | Mel_C1                                                   | Cyanobacteria    |
| 2531839742 | <i>Ca. Caenarcanum bioreactoricola</i>                   | Cyanobacteria    |
| 2541046960 | <i>Ca. Obscuribacter phosphatis</i>                      | Cyanobacteria    |
| 2541046958 | ACD20                                                    | Cyanobacteria    |
| 643348543  | <i>Dictyoglomus turgidum</i> DSM 6724                    | Dictyoglomi      |
| 643348542  | <i>Dictyoglomus thermophilum</i> H-6-12, ATCC 35947      | Dictyoglomi      |
| 642555127  | <i>Elusimicrobium minutum</i> Pei191                     | Elusimicrobia    |
| 642555172  | <i>Candidatus Endomicrobium</i> sp. Rs-D17               | Elusimicrobia    |
| 644736373  | <i>Halorhabdus utahensis</i> AX-2                        | Euryarcheota     |
| 648028040  | <i>Methanoplanus petrolearius</i> SEBR 4847              | Euryarcheota     |
| 638154522  | <i>Thermoplasma volcanium</i> GSS1                       | Euryarcheota     |
| 650377942  | <i>Fibrobacter succinogenes succinogenes</i> S85         | Fibrobacter      |
| 637000117  | <i>Fusobacterium nucleatum nucleatum</i> ATCC 25586      | Fusobacteria     |
| 646311952  | <i>Sebaldella termitidis</i> ATCC 33386                  | Fusobacteria     |
| 644736384  | <i>Leptotrichia buccalis</i> C-1013-b, DSM 1135          | Fusobacteria     |
| 643692024  | <i>Gemmatimonas aurantiaca</i> T-27T                     | Gemmatimonadetes |
| 640963040  | <i>Lentisphaera araneosa</i> HTCC2155                    | Lentisphaerae    |
| 650633000  | <i>Victivallis vadensis</i> ATCC BAA-548                 | Lentisphaerae    |
| 638154511  | <i>Nanoarchaeum equitans</i> Kin4-M                      | Nanoarchaeota    |
| 2540341086 | <i>Leptospirillum ferrooxidans</i> C2-3                  | Nitrospirae      |
| 637000236  | <i>Rhodopirellula baltica</i> SH 1                       | Planctomycetes   |
| 649633083  | <i>Planctomyces brasiliensis</i> IFAM 1448, DSM 5305     | Planctomycetes   |
| 641736268  | <i>Gemmata obscuriglobus</i> UQM 2246                    | Planctomycetes   |
| 643692004  | <i>Azotobacter vinelandii</i> DJ, ATCC BAA-1303          | Proteobacteria   |
| 649633004  | <i>Alicyclophilus denitrificans</i> BC                   | Proteobacteria   |
| 650716078  | <i>Pusillimonas</i> sp. T7-7                             | Proteobacteria   |
| 637000241  | <i>Rhodospirillum rubrum</i> S1, ATCC 11170              | Proteobacteria   |
| 646311920  | <i>Dickeya dadantii</i> Ech586                           | Proteobacteria   |
| 644736355  | <i>Dickeya zeae</i> Ech1591                              | Proteobacteria   |
| 637000207  | <i>Photorhabdus luminescens laumondii</i> TTO1           | Proteobacteria   |
| 650377903  | <i>Acinetobacter calcoaceticus</i> PHEA-2                | Proteobacteria   |
| 643348518  | <i>Borrelia duttonii</i> Ly                              | Spirochaetes     |
| 2506783010 | <i>Leptonema illini</i> 3055, DSM 21528                  | Spirochaetes     |
| 2511231215 | <i>Treponema pallidum pertenue</i> Gauthier              | Spirochaetes     |
| 2505119043 | <i>Thermovirga lienii</i> Cas60314, DSM 17291            | Synergistetes    |
| 646311961  | <i>Thermanaerovibrio acidaminovorans</i> Su883, DSM 6589 | Synergistetes    |
| 645951855  | <i>Jonquetella anthropi</i> E3_33 E1                     | Synergistetes    |
| 2508501115 | <i>Deinococcus pimensis</i> KR-235                       | Thermi           |
| 646564545  | <i>Meiothermus ruber</i> 21, DSM 1279                    | Thermi           |

|            |                                                       |                       |
|------------|-------------------------------------------------------|-----------------------|
| 2515154172 | <i>Thermus igniterrae</i> ATCC 700962                 | Thermi                |
| 2505119042 | <i>Thermodesulfatator indicus</i> CIR29812, DSM 15286 | Thermodesulfobacteria |
| 640427150  | <i>Thermotoga petrophila</i> RKU-1                    | Thermotoga            |
| 2510065086 | <i>Mesotoga prima</i> MesG1Ag4.2                      | Thermotoga            |
| 2519899531 | <i>Thermotoga maritima</i> MSB8, DSM 3109             | Thermotoga            |
| 2517572100 | <i>Opitutaceae</i> sp. TAV2                           | Verrucomicrobia       |
| 641522643  | <i>Opitutus terrae</i> PB90-1                         | Verrucomicrobia       |
| 642791618  | <i>Chthoniobacter flavus</i> Ellin428                 | Verrucomicrobia       |



**Table S7. Table of Pfams used to differentiate cell wall types and flagella assembly, and GI numbers for photosynthesis genes and (bacterio)chlorophyll biosynthesis genes**

The PFAM numbers that were used to differentiate cell wall were obtained from Albertsen et al., 2013. The flagella assembly genes are outlined in Pallen & Matzke, 2006 and the the (bacterio)chlorophyll biosynthesis genes and cut-offs were obtained from Sousa et al., 2012.

| <b>Pfam/GI</b> | <b>Pfam description</b>                                                 |
|----------------|-------------------------------------------------------------------------|
| PF04413        | Glycos_transf_N – (kdottransferase)                                     |
| PF02614        | LpxK – Tetraacyldisaccharide-1-P 4'-kinase                              |
| PF02684        | LpxB – Lipid-A-disaccharide synthetase                                  |
| PF03331        | LpxC – UDP-3-O-acyl N-acetylglucosamine deacetylase                     |
| PF04613        | LpxD – UDP-3-O-[3-hydroxymyristoyl] glucosamine N-acyltransferase, LpxD |
| PF02472        | ExbD – Biopolymer transport protein ExbD/TolR                           |
| PF07244        | Surf_Ag_VNR – Surface antigen variable number repeat                    |
| PF03739        | YjgP_YjgQ – Predicted permease YjgP/YjgQ family                         |
| PF01103        | Bac_surface_Ag – Surface antigen                                        |
| PF00263        | Secretin – Bacterial type II and III secretion system protein           |
| PF02321        | OEP – Outer membrane efflux protein                                     |
| PF03968        | OstA – OstA-like protein                                                |
| PF00593        | TonB_dep_Rec – TonB dependent receptor                                  |
| PF04166        | PdxA – Pyridoxal phosphate biosynthesis protein PdxA                    |
| PF06835        | Lipopolysaccharide-assembly, LptC-related                               |
| PF03740        | PdxJ – Pyridoxal phosphate biosynthesis protein PdxJ                    |
| PF03548        | LolA – Outer membrane lipoprotein carrier protein LolA                  |
| PF04052        | TolB_N – TolB amino-terminal domain                                     |
| PF04453        | OstA_C – Organic solvent tolerance protein                              |
| PF02645        | DegV – Uncharacterised protein, DegV family COG1307                     |
| PF05103        | DivIVA – DivIVA protein                                                 |
| PF02650        | HTH_WhiA – Sporulation Regulator WhiA C terminal domain                 |
| PF10298        | WhiA_N – Sporulation Regulator WhiA N terminal                          |
| PF04472        | DUF552 – Protein of unknown function (DUF552)                           |
| PF04203        | Sortase – Sortase family                                                |
| PF03816        | LytR_cpsA_psr – Cell envelope-related transcriptional attenuator domain |
| PF09269        | DUF1967 – Domain of unknown function (DUF1967)                          |
| PF01424        | R3H – R3H domain                                                        |
| PF01618        | MotA_ExbB – MotA/TolQ/ExbB proton channel family                        |
| PF13677        | MotB_plug – Membrane MotB of proton-channel complex MotA/MotB           |
| PF03963        | FlgD – Flagellar hook capping protein – N-terminal region               |
| PF00460        | Flg_bb_rod – Flagella basal body rod protein                            |
| PF06429        | Flg_bbr_C – Flagellar basal body rod FlgEFG protein C-terminal          |
| PF02107        | FlgH - Flagellar L-ring protein                                         |
| PF02119        | FlgI - Flagellar P-ring protein                                         |
| PF00669        | Flagellin_N – Bacterial flagellin N-terminal helical region             |
| PF00700        | Flagellin_C – Bacterial flagellin C-terminal helical region             |

|                                               |                                                         |
|-----------------------------------------------|---------------------------------------------------------|
| PF02465                                       | FliD_N - Flagellar hook-associated protein 2 N-terminus |
| PF07195                                       | FliD_C - Flagellar hook-associated protein 2 C-terminus |
| PF02049                                       | FliE - Flagellar hook-basal body complex protein FliE   |
| PF01514                                       | YscJ_FliF - Secretory protein of YscJ/FliF family       |
| PF08345                                       | YscJ_FliF_C - Flagellar M-ring protein C-terminal       |
| PF01706                                       | FliG_C - FliG C-terminal domain                         |
| PF02108                                       | FliH - Flagellar assembly protein FliH                  |
| PF02050                                       | FliJ - Flagellar FliJ protein                           |
| PF02154                                       | FliM - Flagellar motor switch protein FliM              |
| PF01052                                       | SpoA - Surface presentation of antigens (SPOA)          |
| PF00813                                       | FliP - FliP family                                      |
| PF01313                                       | Bac_export_3 - Bacterial export proteins, family 3      |
| PF01311                                       | Bac_export_1 - Bacterial export proteins, family 1      |
| PF02561                                       | FliS - Flagellar protein FliS                           |
| PF00771                                       | FHIPEP - FHIPEP protein family                          |
| PF01312                                       | Bac_export_2 - FlhB HrpN YscU SpaS Family               |
| 189347628<br>21674769<br>37522897<br>77463857 | bchH                                                    |
| 189346994<br>21674119<br>37520439<br>77463844 | bchD                                                    |
| 21674120<br>37521283<br>77463843              | bchI                                                    |
| 21674770<br>37523971<br>77463859              | bchM                                                    |
| 21674771<br>77463851                          | bchE                                                    |
| 77463865                                      | acsF                                                    |
| 21673889                                      | bciA                                                    |
| 16331168                                      | bciB                                                    |
| 159462468                                     | LPOR                                                    |
| 189347668<br>21674961<br>37521938<br>77463855 | bchN                                                    |
| 21674960<br>37519784<br>77463856              | bchB                                                    |
| 189347666<br>21674959<br>37521939<br>77463858 | bchL                                                    |
